# Supplementary material for: Socioeconomic gradients of adverse birth outcomes and related maternal factors in rural and urban Alberta, Canada: a concentration index approach
Source: PubMed Central journal article supplement — BMJ Open. 2020 Feb 2;10(1):e033296. doi: 10.1136/bmjopen-2019-033296 (PMC7045252; doi:10.1136/bmjopen-2019-033296), 2020-02-02
Supplement: bmjopen-2019-033296.draft_revisions.pdf [file bmjopen-2019-033296.draft_revisions.pdf]

# BMJ Open

BMJ Open is committed to open peer review. As part of this commitment we make the peer review history of every article we publish publicly available.

When an article is published we post the peer reviewers' comments and the authors' responses online. We also post the versions of the paper that were used during peer review. These are the versions that the peer review comments apply to.

The versions of the paper that follow are the versions that were submitted during the peer review process. They are not the versions of record or the final published versions. They should not be cited or distributed as the published version of this manuscript.

BMJ Open is an open access journal and the full, final, typeset and author-corrected version of record of the manuscript is available on our site with no access controls, subscription charges or pay-per-view fees (<http://bmjopen.bmj.com>).

If you have any questions on BMJ Open's open peer review process please email [info.bmjopen@bmj.com](mailto:info.bmjopen@bmj.com)

# BMJ Open

## Socioeconomic Gradients of Adverse Birth Outcomes and Related Maternal Factors in Rural and Urban Alberta, Canada: A Concentration Index Approach.

|                               |                                                                                                                                                                                                                                                                                                                                                                                                                                                                                                                                                                                                                                                                                                                                                    |
|-------------------------------|----------------------------------------------------------------------------------------------------------------------------------------------------------------------------------------------------------------------------------------------------------------------------------------------------------------------------------------------------------------------------------------------------------------------------------------------------------------------------------------------------------------------------------------------------------------------------------------------------------------------------------------------------------------------------------------------------------------------------------------------------|
| Journal:                      | <i>BMJ Open</i>                                                                                                                                                                                                                                                                                                                                                                                                                                                                                                                                                                                                                                                                                                                                    |
| Manuscript ID                 | bmjopen-2019-033296                                                                                                                                                                                                                                                                                                                                                                                                                                                                                                                                                                                                                                                                                                                                |
| Article Type:                 | Research                                                                                                                                                                                                                                                                                                                                                                                                                                                                                                                                                                                                                                                                                                                                           |
| Date Submitted by the Author: | 30-Jul-2019                                                                                                                                                                                                                                                                                                                                                                                                                                                                                                                                                                                                                                                                                                                                        |
| Complete List of Authors:     | Ospina, Maria; University of Alberta, Department of Obstetrics & Gynecology. Faculty of Medicine & Dentistry<br>Osornio-Vargas, Álvaro Román; University of Alberta, Department of Pediatrics. Faculty of Medicine & Dentistry<br>Nielsen, Charlene; University of Alberta, Department of Pediatrics. Faculty of Medicine & Dentistry<br>Crawford, Susan; Alberta Health Services, Alberta Perinatal Health Program.<br>Kumar, Manoj; University of Alberta, Department of Pediatrics. Faculty of Medicine & Dentistry.<br>Aziz, Khalid; University of Alberta, Department of Pediatrics. Faculty of Medicine & Dentistry<br>Serrano-Lomelin, Jesus; University of Alberta, Department of Obstetrics & Gynecology. Faculty of Medicine & Dentistry |
| Keywords:                     | EPIDEMIOLOGY, Maternal medicine < OBSTETRICS, PUBLIC HEALTH, SOCIAL MEDICINE                                                                                                                                                                                                                                                                                                                                                                                                                                                                                                                                                                                                                                                                       |
|                               |                                                                                                                                                                                                                                                                                                                                                                                                                                                                                                                                                                                                                                                                                                                                                    |

SCHOLARONE™  
Manuscripts

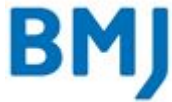

I, the Submitting Author has the right to grant and does grant on behalf of all authors of the Work (as defined in the below author licence), an exclusive licence and/or a non-exclusive licence for contributions from authors who are: i) UK Crown employees; ii) where BMJ has agreed a CC-BY licence shall apply, and/or iii) in accordance with the terms applicable for US Federal Government officers or employees acting as part of their official duties; on a worldwide, perpetual, irrevocable, royalty-free basis to BMJ Publishing Group Ltd ("BMJ") its licensees and where the relevant Journal is co-owned by BMJ to the co-owners of the Journal, to publish the Work in this journal and any other BMJ products and to exploit all rights, as set out in our [licence](#).

The Submitting Author accepts and understands that any supply made under these terms is made by BMJ to the Submitting Author unless you are acting as an employee on behalf of your employer or a postgraduate student of an affiliated institution which is paying any applicable article publishing charge ("APC") for Open Access articles. Where the Submitting Author wishes to make the Work available on an Open Access basis (and intends to pay the relevant APC), the terms of reuse of such Open Access shall be governed by a Creative Commons licence – details of these licences and which [Creative Commons](#) licence will apply to this Work are set out in our licence referred to above.

Other than as permitted in any relevant BMJ Author's Self Archiving Policies, I confirm this Work has not been accepted for publication elsewhere, is not being considered for publication elsewhere and does not duplicate material already published. I confirm all authors consent to publication of this Work and authorise the granting of this licence.

1  
2  
3 **Title.** Socioeconomic Gradients of Adverse Birth Outcomes and Related Maternal Factors in  
4 Rural and Urban Alberta, Canada: A Concentration Index Approach  
5  
6  
7  
8  
9

10 **Authors:** Maria B. Ospina, MSc, PhD;<sup>1</sup> Alvaro Osornio-Vargas, MD, PhD;<sup>2</sup> Charlene C.  
11 Nielsen, PhD;<sup>2</sup> Susan Crawford, MSc;<sup>3</sup> Manoj Kumar, MD, MSc;<sup>2</sup> Khalid Aziz, MD;<sup>2</sup> Jesus A.  
12 Serrano-Lomelin, PhD<sup>1</sup>  
13  
14  
15  
16  
17  
18

19 <sup>1</sup>Department of Obstetrics & Gynecology, Faculty of Medicine & Dentistry; University of  
20 Alberta. Edmonton, Alberta (Canada)  
21  
22  
23  
24  
25

26 <sup>2</sup>Department of Pediatrics, Faculty of Medicine & Dentistry; University of Alberta. Edmonton,  
27 Alberta (Canada)  
28  
29  
30  
31  
32

33 <sup>3</sup>Alberta Perinatal Health Program, Alberta Health Services. Calgary, Alberta (Canada).  
34  
35  
36  
37

### 38 **Corresponding Author**

39 Jesus Serrano-Lomelin, PhD

40 Department of Obstetrics & Gynecology, University of Alberta.

41 220A Heritage Medical Research Centre

42 11313 87 Ave NW, Edmonton, AB, Canada. T6G 2S2

43 Ph: (780) 735-8732; F: (780) 735-4981

44 [45 jaserran@ualberta.ca](mailto:jaserran@ualberta.ca)

46 **Word count: 3,057**  
47  
48  
49  
50  
51  
52  
53  
54  
55  
56  
57  
58  
59  
60

1  
2  
3 **Keywords:** health inequalities; concentration index; adverse birth outcomes; perinatal risk  
4 factors; social medicine.  
5  
6  
7  
8  
9

### 10 **Contributors' Statement**

11  
12 Maria B. Ospina participated in investigation, conceptualization/design, methodology, drafted  
13 the initial manuscript, and approved the final version of the manuscript.  
14  
15

16  
17 Alvaro Osornio-Vargas participated in funding acquisition, resources, conceptualization/design,  
18 supervision, critically review/edit the manuscript, and approved the final version of the  
19 manuscript.  
20  
21

22  
23  
24 Charlene C. Nielsen, participated in conceptualization/design, methodology, geographic analysis,  
25 and approved the final version of the manuscript.  
26  
27

28  
29 Susan Crawford participated in conceptualization/design, resources (health data provider),  
30 critically review/edit the manuscript, and approved the final version of the manuscript.  
31  
32

33  
34 Manoj Kumar participated in funding acquisition, conceptualization/design, supervision,  
35 critically review/edit the manuscript, and approved the final version of the manuscript.  
36  
37

38  
39 Khalid Aziz participated in funding acquisition, conceptualization/design, supervision, critically  
40 review/edit the manuscript, and approved the final version of the manuscript.  
41  
42

43  
44 Jesus Serrano-Lomelin participated in funding acquisition, conceptualization/design, database  
45 management, statistical analysis, critically review/edit the manuscript, and approved the final  
46 version of the manuscript.  
47  
48  
49

## ABSTRACT

**Objective:** Using a summary measure of health inequalities, this study evaluated the distribution of adverse birth outcomes (ABO) and related maternal risk factors across socioeconomic status (SES) gradients in urban and rural Alberta, Canada.

**Design:** Cross-sectional study using a validated perinatal clinical registry and an area-level SES.

**Setting:** The study was conducted in Alberta (Canada). Data about ABO and related maternal risk factors were obtained from the Alberta Perinatal Health Program (APHP). An area-level SES index derived from census data (2006) was linked to the postal code at delivery.

**Participants:** Women (n=330,957) having singleton live births with gestational age  $\geq 22$  weeks identified in the APHP between 2006 to 2012.

**Primary and secondary outcome measures:** We estimated concentration indexes to assess inequalities across SES gradients in both rural and urban areas (CIdx<sub>R</sub> and CIdx<sub>U</sub>, respectively) for spontaneous preterm birth (PTB), small for gestational age (SGA), large for gestational age (LGA), gestational hypertension, gestational diabetes, smoking and/or substance use during pregnancy, and pre-pregnancy weight  $> 91$  kg.

**Results:** The highest health inequalities disfavoring low SES groups were identified for substance abuse and smoking in rural areas (CIdx<sub>R</sub> -0.38 and -0.23, respectively). Medium inequalities were identified for LGA (CIdx<sub>R</sub> -0.08), weight  $>91$ kg (CIdx<sub>R</sub> -0.07), substance use (CIdx<sub>U</sub> -0.15), smoking (CIdx<sub>U</sub> -0.14), gestational diabetes (CIdx<sub>U</sub> -0.10), and SGA (CIdx<sub>U</sub> -0.07). Low inequalities were identified for PTB (CIdx<sub>R</sub> -0.05; CIdx<sub>U</sub> -0.05) and gestational diabetes (CIdx<sub>R</sub> -0.04). Inequalities disfavoring high SES groups were identified for gestational hypertension (CIdx<sub>R</sub> +0.04), SGA (CIdx<sub>R</sub> +0.03), and LGA (CIdx<sub>U</sub> +0.03).

1  
2  
3 **Conclusions:** Adverse birth outcomes and related maternal risk factors were unequally  
4 distributed across the socioeconomic gradient in urban-rural settings, with the greatest  
5 concentrations in lower SES groups of rural areas. Future research is needed on underlying  
6 mechanisms driving SES gradients in perinatal health across the rural/urban spectrum.  
7  
8  
9  
10  
11  
12  
13

#### 14 **Strengths and limitations of this study**

- 15  
16  
17  
18 • This population-based study used a high-quality clinical perinatal registry to quantify  
19 health inequalities for adverse birth outcomes and related risk factors across  
20 socioeconomic groups in rural and urban Alberta (Canada); a province with universal and  
21 free access to medically necessary hospital and physician services for its inhabitants.  
22  
23  
24  
25  
26
- 27 • We used a well-known and robust method, the concentration index, to compare  
28 socioeconomic inequalities in perinatal health in urban and rural areas.  
29  
30  
31
- 32 • The area-level socioeconomic status (SES) index used for this study is based on the 2006  
33 census data. Potential misclassification of the SES may occur as we are assuming no  
34 changes in area-level SES index between 2006 and 2012.  
35  
36  
37
- 38 • Substance abuse and smoking prevalence are expected to be underestimated since they  
39 are self-reported.  
40  
41  
42  
43  
44  
45  
46  
47  
48  
49  
50  
51  
52  
53  
54  
55  
56  
57  
58  
59  
60

## INTRODUCTION

Adverse birth outcomes such as preterm birth (PTB), small for gestational age (SGA), and large for gestational age (LGA) are major drivers of morbidity and mortality in neonates and infants and important contributors to long-term physical and psychological health.[1-3] Many of the determinants of adverse birth outcomes start in pregnancy and even before conception. Maternal factors implicated with the occurrence of adverse outcomes at birth include pre-pregnancy overweight, maternal health problems during pregnancy (e.g., gestational hypertension and diabetes), and certain behaviours such as smoking and substance use.[1, 4] All these perinatal exposures and outcomes constitutes the “canary in the coal mine” as fundamental early-life indicators of the impact of social and structural determinants of health operating in a very sensitive period of human life.[5] Health inequalities at birth would then represent a magnifying glass of preconception disadvantages, and a forecast for adult inequalities.[6]

Socioeconomic inequalities in health are quantitative differences in the occurrence of health outcomes across socioeconomic groups,[7] and a topic of great interest in social epidemiology to better understand the structural causes of health and disease.[8, 9] Recent systematic reviews have examined the influences of socioeconomic characteristics on the risk of adverse birth outcomes, suggesting a strong link between area-level socioeconomic status (SES) gradients and a variety of adverse birth outcomes.[12-15] Despite the growing interest in recent years about the role of spatial[16] and socioeconomic-driven inequalities[9] in the distribution of adverse birth outcomes and associated maternal factors, studies in this area have mainly evaluated urban populations. Few studies[17, 18] have examined the relationship between adverse birth outcomes and neighborhood deprivation in rural versus urban communities, a relevant health policy issue



1  
2  
3 in countries where the access to health services is universal. The study of socioeconomic health  
4 inequalities have been traditionally based on population-at-risk approaches, which have  
5 underpinned the socioeconomic gradient as a risk factor for poor health.[10, 11] The majority of  
6 these studies have used analytical approaches based on measures of association (i.e., regression  
7 and Pearson coefficients), and measures of potential impact (i.e., proportion attributable  
8 proportions[28]) while other methods based on summary measures of health inequality have  
9 been seldom explored.[28]  
10  
11  
12  
13  
14  
15  
16  
17  
18  
19  
20

21 Using the health concentration index approach, this study quantified health inequalities in the  
22 distribution of PTB, SGA, LGA, and related known maternal factors (i.e., pre-pregnancy weight  
23 >91 kg, gestational hypertension, gestational diabetes, self-reported smoking and/or substance  
24 use during pregnancy) in urban and rural Alberta (Canada) across a socioeconomic gradient.  
25 Like all other Canadian provinces, Alberta has a universal, publicly funded health care system  
26 that guarantees Albertans receive free access to medically necessary hospital and physician  
27 services. The concentration index quantifies the magnitude of perinatal health inequalities across  
28 different populations while taking into account both the distribution of the study population  
29 across the different socioeconomic groups.  
30  
31  
32  
33  
34  
35  
36  
37  
38  
39  
40  
41  
42  
43

## 44 **METHODS**

45 This study is part of a broader environmental health research that explored associations between  
46 environmental and social factors with adverse birth outcomes.[19] The study received ethics  
47 approval from the University of Alberta Research Ethics Board in Edmonton, Alberta (Canada).  
48  
49  
50  
51  
52  
53  
54  
55  
56  
57  
58  
59  
60

## Study design and population

We conducted a cross-sectional population-based study using provincial health data from Alberta (Canada) for the period of January 1, 2006, to December 31, 2012. Alberta is a culturally diverse province located in Western Canada with a population of 4,067,175 inhabitants in 2016 with approximately 83% living in urban centers.[20]

The study population consisted of all women having singleton live births with gestational age  $\geq$  22 completed weeks during the study period. The APHP is a validated clinical perinatal registry that collects data directly from the provincial delivery record for all births occurring in a hospital or attended by a registered midwife at home in Alberta. Delivery characteristics and newborn health status recorded in the APHP include birth weight, gestational age at delivery in completed weeks, maternal postal code of residence at delivery, lifestyle behaviours before and during pregnancy, maternal health status, obstetric interventions and neonatal outcomes.

## Adverse birth outcomes

Preterm birth (PTB) was defined as newborn with less than 37 completed weeks of gestational age. Newborns were identified as SGA (birth weight below the 10<sup>th</sup> percentile) and LGA (birth weight above the 90<sup>th</sup> percentile) according to Canadian sex-age specific, population-based standards.[21]

## Maternal factors related with PTB, SGA and LGA

Information on the following maternal factors was extracted from the APHP: age at delivery, pre-pregnancy weight >91 kg, gestational hypertension, gestational diabetes (documented

1  
2  
3 hyperglycemia with diagnosis during current pregnancy only), self-reported smoking (anytime  
4 during pregnancy) and/or substance use during pregnancy (three drinks or more on any occasion  
5 during pregnancy or one or more alcohol drinks per day while pregnant, and/or drug dependency,  
6 inappropriate or excessive use of any substance).  
7  
8  
9  
10  
11  
12  
13

### 14 **Definitions of urban and rural maternal place of residence at delivery**

15  
16 The six-character postal codes of the maternal place of residence at delivery were classified as  
17 rural or urban according to population concentration and density. First, postal codes were  
18 assigned to their corresponding dissemination area (DA: a census geographic area larger than  
19 postal codes with a population of 400 to 700 persons according to the 2006 census geography  
20 definition).[22] A vector overlay of postal code locations within the Statistics Canada DA  
21 boundary file was performed to capture postal codes not included in the 2006 geographic  
22 framework.[23, 24] The DA geolocation of postal codes was then used to classify maternal place  
23 of residence at delivery into urban or rural. A DA was considered urban if it had a minimum  
24 population concentration of 1,000 persons and a population density of at least 400 persons per  
25 square kilometer based on the 2006 Census population count; otherwise, the DA was classified  
26 as rural.[22] The Statistics Canada GeoSuite was the standard to identify geographical  
27 characteristics of georeferenced data.[25]  
28  
29  
30  
31  
32  
33  
34  
35  
36  
37  
38  
39  
40  
41  
42  
43  
44  
45

### 46 **Socioeconomic status gradients**

47  
48 The 2006 socioeconomic status (SES) index developed by Chan et al.[26] was chosen to  
49 represent area-based socioeconomic gradients in the study population. This index is based on  
50 area-level information about education attainment, employment status, income, marital status,  
51 home ownership, transport mode, and year of home-construction, among other variables taken  
52  
53  
54  
55  
56  
57  
58  
59  
60

1  
2  
3 from the 2006 national Census. Additionally, the SES index incorporated a measure of  
4  
5 Indigenous status or the human developmental index of the individuals' country of origin as a  
6  
7 proxy for ethnicity; which is a variable that has been linked to perinatal outcomes.[13, 27] The  
8  
9 SES index was ranked in quintiles (Q1 to Q5) at the DA level, where Q1 and Q5 correspond to  
10  
11 the lowest and highest SES, respectively.  
12  
13  
14  
15

### 16 17 **Statistical analyses**

18  
19 We calculated the period prevalence of PTB, SGA, LGA, and related maternal factors in both  
20  
21 urban and rural settings across SES quintiles. We calculated the absolute concentration index[28]  
22  
23 with 95% confidence intervals (95%CI) to measure inequalities in the period prevalence of  
24  
25 adverse birth outcomes and related maternal factors by SES groups in both rural (CIdx<sub>U</sub>) and  
26  
27 urban (CIdx<sub>U</sub>) settings. Briefly, the concentration index measures inequality in the distribution of  
28  
29 a health variable (i.e., adverse birth outcomes or related maternal factors) over the population  
30  
31 grouped across the SES quintiles.[28, 29] Values of the concentration index range from -1 to +1  
32  
33 where the larger the absolute value of the concentration index, the higher the level of health  
34  
35 inequalities.[11] A value of zero indicates the absence of a socioeconomic gradient in the  
36  
37 distribution of adverse birth outcomes and related factors in the study population. Positive values  
38  
39 indicate a concentration of the health outcome among advantaged groups, while negative values  
40  
41 indicate a concentration of the health outcome among the more disadvantaged ones.[30] Degrees  
42  
43 of inequalities were interpreted based on the absolute value of the concentration index as low ( $\leq$   
44  
45 |0.05|), medium (|0.06 to 0.19|), and high ( $\geq$  |0.20|).[31]  
46  
47  
48  
49  
50  
51  
52

53 We used forest plots to display CIdx<sub>U</sub> and CIdx<sub>U</sub> values with 95% CI for both adverse birth  
54  
55 outcomes and related maternal factors. If the estimate of the concentration index and its 95%CI  
56  
57  
58  
59  
60

1  
2  
3 cross zero (no inequality), all SES groups have the same distribution of the health outcome and  
4 no socioeconomic gradient exists. If concentration index and 95% CI values are to the left of the  
5 no inequality line, a socioeconomic gradient exist with lower SES groups having a higher  
6 concentration of the outcomes. If values are to the right of the no inequality line, the outcome is  
7 concentrated in higher SES groups. All statistical analyses were performed using STATA  
8 version 15.1 (STATA Corp., College Station, TX, USA).  
9  
10  
11  
12  
13  
14  
15  
16  
17  
18

## 19 RESULTS

20  
21 A total of 349,762 births occurred in Alberta between 2006 and 2012, of which 334,894 were  
22 singleton live births with gestational age >22 of completed weeks. A total of 330,957 deliveries  
23 were included in the analyses after geographic classification (**Figure 1**), of which 292,357 were  
24 births from women living in urban settings, and 38,600 from those living in rural areas at time of  
25 delivery.  
26  
27  
28  
29  
30  
31  
32  
33  
34

### 35 Prevalence of adverse birth outcomes and related maternal factors in urban and rural 36 settings 37

38  
39 **Table 1** shows the prevalence of adverse birth outcomes and maternal factors by SES groups in  
40 rural and urban areas. The PTB prevalence was similar in both rural and urban settings (6.8%);  
41 with small differences across SES quintiles and reductions as the SES increased. The prevalence  
42 of SGA was consistently higher in urban areas (9.2%; 95% CI 9.1, 9.3 versus 6.8%; 95% CI 6.5,  
43 7.0). Urban prevalence of SGA decreased with higher SES while rural SGA prevalence increased  
44 with higher SES. LGA prevalence was higher in rural areas (12.7%; 95% CI 12.3, 13.0) and  
45 decreased as the SES increased (Q1: 16.1%; 95% CI 15.3, 16.9; Q5: 10.5%; 95% CI 9.9, 11.2);  
46  
47  
48  
49  
50  
51  
52  
53  
54  
55  
56  
57  
58  
59  
60

1  
2  
3 while in urban settings, LGA prevalence increased from 8.6% (95% CI 8.3, 8.8) to 10.1% (95%  
4 CI 9.8, 10.3) across the SES gradient.  
5  
6  
7  
8  
9

10 Gestational hypertension was more prevalent in urban (5.3%; 95% CI 5.2, 5.4) versus rural  
11 settings (4.7%; 95% CI 4.5, 4.9) with similar distributions across the SES groups in both urban  
12 and rural areas of residence. The proportion of women with pre-pregnancy weight >91 kg was  
13 higher in rural (11.2%; 95% CI 10.8, 11.5) versus urban areas (9.0%; 95% CI 8.9, 9.1) and both  
14 settings had a clear gradient across the SES groups with highest values in the most deprived  
15 group. The prevalence of gestational diabetes was higher in urban (5.2%; 95% CI 5.1, 5.3) than  
16 in rural settings (3.6%; 95% CI 3.4, 3.8), with larger differences between the lowest and highest  
17 SES groups (Q1 7.2%; 95% CI 5.1, 5.3. Q5: 4.1%; 95% CI 4.0, 4.3). In rural settings, gestational  
18 diabetes prevalence was particularly high in the most disadvantaged group compared to the other  
19 SES groups.  
20  
21  
22  
23  
24  
25  
26  
27  
28  
29  
30  
31  
32  
33  
34

35 Smoking during pregnancy was higher in rural (24.1%; 95% CI 23.6, 24.5) versus urban (15.2%;  
36 95% CI 15.0, 15.3) areas, particularly in the most deprived rural SES group (Q1 45.7%; 95%  
37 44.7, 46.8). For both urban and rural areas, there was a SES gradient in the prevalence of  
38 smoking in pregnancy with lower SES groups having the higher burden of disease. Substance  
39 use during pregnancy was more prevalent in rural areas (5.5%; 95% CI 5.2, 5.7) and showed  
40 slight variations in the distribution across SES groups. Urban prevalence of substance use during  
41 pregnancy (3.0%; 95% CI 2.9, 3.0) showed a gradient across SES groups, with decreasing  
42 numbers as SES increased.  
43  
44  
45  
46  
47  
48  
49  
50  
51  
52  
53  
54  
55  
56  
57  
58  
59  
60

1  
2  
3  
4  
5  
6  
7  
8  
9  
10  
11  
12  
13  
14  
15  
16  
17  
18  
19  
20  
21  
22  
23  
24  
25  
26  
27  
28  
29  
30  
31  
32  
33  
34  
35  
36  
37  
38  
39  
40  
41  
42  
43  
44  
45  
46  
47

**Table 1.** Prevalence of ABO and Maternal Risk Factors by Socio-Economic Quintiles in Urban and Rural Alberta (2006-2012).

| Maternal Area of Residence at Delivery |                     | Adverse Birth Outcomes |                   |                   | Maternal Risk Factors |                          |                      |                   |                   |
|----------------------------------------|---------------------|------------------------|-------------------|-------------------|-----------------------|--------------------------|----------------------|-------------------|-------------------|
|                                        |                     | PTB                    | SGA               | LGA               | Weight > 91kg         | Gestational hypertension | Gestational diabetes | Smoking           | Substance use     |
| Urban                                  | N                   | 19,924                 | 26,893            | 27,874            | 25,987                | 15,452                   | 15,147               | 44,004            | 8,634             |
|                                        | Overall (% [95%CI]) | 6.8 [6.7, 6.9]         | 9.2 [9.1, 9.3]    | 9.5 [9.4, 9.6]    | 9.0 [8.9, 9.1]        | 5.3 [5.2, 5.4]           | 5.2 [5.1, 5.3]       | 15.2 [15.0, 15.3] | 3.0 [2.9, 3.0]    |
|                                        | Q1 (low SES)        | 7.9 [7.7, 8.2]         | 11.4 [11.1, 11.7] | 8.6 [8.3, 8.8]    | 9.0 [8.7, 9.3]        | 5.2 [5.0, 5.4]           | 7.2 [7.0, 7.5]       | 20.1 [19.8, 20.5] | 4.3 [4.1, 4.4]    |
|                                        | Q2                  | 7.2 [7.0, 7.4]         | 10 [9.7, 10.2]    | 9.4 [9.1, 9.6]    | 9.9 [9.6, 10.1]       | 5.3 [5.1, 5.5]           | 5.8 [5.6, 6.0]       | 19.1 [18.8, 19.5] | 3.5 [3.3, 3.6]    |
|                                        | Q3                  | 6.9 [6.7, 7.1]         | 9.1 [8.9, 9.3]    | 9.6 [9.3, 9.8]    | 9.5 [9.3, 9.8]        | 5.4 [5.2, 5.5]           | 4.9 [4.7, 5.1]       | 16.6 [16.3, 16.9] | 3.2 [3.1, 3.4]    |
|                                        | Q4                  | 6.5 [6.3, 6.7]         | 8.8 [8.5, 9.0]    | 9.7 [9.5, 9.9]    | 8.8 [8.5, 9.0]        | 5.5 [5.3, 5.7]           | 5.0 [4.8, 5.1]       | 13.4 [13.1, 13.7] | 2.5 [2.4, 2.7]    |
|                                        | Q5 (high SES)       | 6.1 [5.9, 6.3]         | 7.9 [7.7, 8.1]    | 10.1 [9.8, 10.3]  | 8.1 [7.9, 8.2]        | 5.2 [5.1, 5.4]           | 4.1 [4.0, 4.3]       | 10.0 [9.8, 10.2]  | 2.0 [1.9, 2.1]    |
| Rural                                  | N                   | 2,636                  | 2,616             | 4,895             | 4,248                 | 1,790                    | 1,360                | 9,170             | 2,112             |
|                                        | Overall (% [95%CI]) | 6.8 [6.6, 7.1]         | 6.8 [6.5, 7.0]    | 12.7 [12.3, 13.0] | 11.2 [10.8, 11.5]     | 4.7 [4.5, 4.9]           | 3.6 [3.4, 3.8]       | 24.1 [23.6, 24.5] | 5.5 [5.2, 5.7]    |
|                                        | Q1 (low SES)        | 8.4 [7.8, 8.9]         | 6.4 [5.9, 7.0]    | 16.1 [15.3, 16.9] | 13.5 [12.8, 14.2]     | 4.2 [3.8, 4.7]           | 4.5 [4.1, 5.0]       | 45.7 [44.7, 46.8] | 14.3 [13.6, 15.0] |
|                                        | Q2                  | 6.1 [5.6, 6.6]         | 6.1 [5.6, 6.6]    | 13.0 [12.2, 13.7] | 11.4 [10.6, 12.1]     | 4.7 [4.2, 5.2]           | 3.1 [2.7, 3.5]       | 19.1 [18.2, 19.9] | 2.9 [2.5, 3.3]    |
|                                        | Q3                  | 6.8 [6.1, 7.4]         | 7.2 [6.6, 7.9]    | 11.7 [10.8, 12.5] | 10.7 [9.9, 11.5]      | 4.7 [4.2, 5.3]           | 3.2 [2.7, 3.7]       | 20.6 [19.6, 21.7] | 3.8 [3.3, 4.3]    |
|                                        | Q4                  | 6.5 [6.0, 7.0]         | 7.2 [6.6, 7.7]    | 11.7 [11.1, 12.4] | 10.6 [10.0, 11.3]     | 4.5 [4.1, 4.9]           | 3.3 [2.9, 3.7]       | 20.1 [19.2, 20.9] | 3.2 [2.8, 3.6]    |
|                                        | Q5 (high SES)       | 6.3 [5.8, 6.8]         | 7.0 [6.4, 7.6]    | 10.5 [9.9, 11.2]  | 9.4 [8.8, 10.1]       | 5.4 [4.9, 5.9]           | 3.5 [3.1, 3.9]       | 12.7 [12.0, 13.4] | 2.2 [1.9, 2.5]    |

CI = confidence interval; n = number of cases; Q = quintiles; SES = socioeconomic status

## Concentration indices by SES groups in urban and rural settings

**Figure 2** shows rural ( $CIdx_U$ ) and urban ( $CIdx_U$ ) concentration indexes for adverse birth outcomes and related maternal factors. The majority of adverse birth outcomes and related maternal factors were unequally distributed, and concentrated in the lower SES groups except for SGA (which was concentrated in higher SES groups of rural areas;  $CIdx_R$  0.03; 95% CI 0.01, 0.05), LGA (concentrated in urban higher SES groups;  $CIdx_U$  0.03; 95% CI 0.02, 0.03) and gestational hypertension (concentrated in higher SES groups of rural areas;  $CIdx_R$  0.04; 95% CI 0.01, 0.06). There were no inequalities in the distribution of gestational hypertension by SES groups in urban areas.

The highest degrees of health inequalities across SES groups were found for substance abuse and smoking in rural areas ( $CIdx_R$  |0.38| and |0.23|, respectively). Medium inequalities across SES groups were identified for LGA and weight >91kg in rural areas ( $CIdx_R$  |0.08| and |0.07|, respectively) and for substance use ( $CIdx_U$  |0.15|), smoking ( $CIdx_U$  |0.14|), gestational diabetes ( $CIdx_U$  |0.10|), and SGA ( $CIdx_U$  |0.07|) in urban settings. A low degree of inequalities was identified in the distribution of PTB ( $CIdx_R$  |0.05|), SGA ( $CIdx_R$  |0.03|), gestational hypertension ( $CIdx_R$  |0.04|), and gestational diabetes ( $CIdx_R$  |0.04|) across SES in rural settings. LGA ( $CIdx_U$  |0.03|), gestational hypertension ( $CIdx_U$  |0.01|), and weight >91 kg ( $CIdx_U$  |0.03|) also had a low degree of inequalities across SES groups in urban settings.

## DISCUSSION

In this cross-sectional population-based study, we used concentration indexes to examine SES gradients for adverse birth outcomes and related maternal behavioural factors in urban and rural



1  
2  
3 areas of Alberta. The results revealed that adverse birth outcomes and related maternal factors  
4  
5 are unequally distributed across the socioeconomic gradient in the urban-rural divide, with the  
6  
7 majority of them concentrating in lower SES groups. Specifically, the concentration indexes of  
8  
9 PTB and related maternal factors (pre-pregnancy weight > 91 kg, gestational diabetes, smoking  
10  
11 and substance abuse) demonstrated the existence of a gradient of perinatal inequalities in both  
12  
13 urban and rural areas that affected the lowest SES groups. The largest socioeconomic gradient  
14  
15 was observed for smoking and substance use during pregnancy as lower SES groups from rural  
16  
17 areas were affected the most.  
18  
19  
20  
21  
22  
23

24 Area-level deprivation seems to affect differentially fetal growth and pregnancy length. One of  
25  
26 the potential explanations for these results is that women residing in rural areas are more  
27  
28 vulnerable to neighbourhood deprivation.[32] For example, there is evidence that pregnant  
29  
30 women in the younger groups living in rural areas have the highest odds for adverse pregnancy  
31  
32 outcomes compared to their counterparts living in urban settings.[33] Additionally, lower SES,  
33  
34 more unhealthy maternal behaviours, and more limited access to health care resources and  
35  
36 adequate prenatal care have been described among rural residents compared to those in urban  
37  
38 areas.[17, 34-36] The existence of synergistic deleterious influences of area-level determinants  
39  
40 and individual factors may account for these differences.  
41  
42  
43  
44  
45  
46

47 To our knowledge, few studies (reported in [40]) have evaluated SES gradients in adverse birth  
48  
49 outcomes and related maternal factors in Canada. One study[40] evaluated socioeconomic  
50  
51 inequality in health across the provinces in Canada over time (1998-2011) suggesting that those  
52  
53 inequalities have widened over time, especially among women. However, in this study Alberta  
54  
55  
56  
57  
58  
59

1  
2  
3 was merged with Saskatchewan and Manitoba to form the Prairies. A few studies have evaluated  
4 the influence of area-level SES on adverse birth outcomes in rural and urban areas using other  
5 epidemiological approaches and yielding conflicting results.[32, 37].  
6  
7  
8  
9

10  
11  
12 We used a well-known and robust method, the concentration index, to compare socioeconomic  
13 inequalities in perinatal health in urban and rural areas.[11, 29, 30] Compared to other  
14 approaches to the study of health inequalities, the concentration index has some advantages. For  
15 example, results are not biased by the sample size of the SES strata in the study population. The  
16 graphical display of the concentration index allows a visual representation of the dominance  
17 relationships in the distribution of the outcomes across SES strata and between urban and rural  
18 groups.  
19  
20  
21  
22  
23  
24  
25  
26  
27  
28  
29

30  
31 This study described the prevalence of maternal factors related to adverse birth outcomes in  
32 Alberta for a singleton birth cohort; thus, generalization of the analysis of concentration indexes  
33 to other places or populations is limited. There are other limitations in this study inherent to the  
34 cross-sectional nature of the study and the lack of detailed clinical information available in the  
35 APHP regarding maternal factors. For example, the variable pre-pregnancy maternal weight > 91  
36 kg was used as a proxy for overweight/obesity since information on the exact weight and height  
37 is not available in the APHP to calculate body mass index. Another limitation of the study is the  
38 reliance on self-reporting of smoking and substance use during pregnancy. Self-reporting is a  
39 common problem in population studies[38] as these factors may introduce non-differential bias  
40 in the evaluation of the exposures.  
41  
42  
43  
44  
45  
46  
47  
48  
49  
50  
51  
52  
53  
54  
55  
56  
57  
58  
59  
60

1  
2  
3 Another potential limitation in the study is that the SES measure incorporates area-level census  
4 information about income in the calculation. In rural areas, where farming and informal  
5 economic sectors are highly prevalent, income may not be precisely estimated and this may  
6 introduce some misclassification of the SES in the calculations. Furthermore, no changes in the  
7 area-level SES were assumed. Despite this, area-level SES indicators have been used in health  
8 research as a good proxy for a missing individual-level measures [41,42], and our analyses were  
9 disaggregated by SES quantiles in urban and rural areas separately. This approach allowed the  
10 identification of subgroups where special attention is needed in both urban and rural areas.  
11  
12  
13  
14  
15  
16  
17  
18  
19  
20  
21  
22  
23

24 Studies about socioeconomic gradients in health provide a way to identify gaps that characterize  
25 the health (or ill health) of socioeconomic groups,[7] helping health authorities to evaluate the  
26 performance of health care systems, policies, and interventions.[39] Our evaluation of  
27 inequalities in perinatal health and influential factors across urban and rural areas have important  
28 implications. First, improving accessibility and adequate and high-quality prenatal care,  
29 especially for the lower SES groups may reduce socioeconomic-related inequalities in maternal  
30 and perinatal health in both rural and urban areas. Particularly, the most disadvantaged groups  
31 are concentrated in rural areas in terms of their perinatal outcomes. Interventions targeting these  
32 rural populations in terms of increasing perinatal health and income can be a cost-effective tool  
33 to tackle these health inequalities.  
34  
35  
36  
37  
38  
39  
40  
41  
42  
43  
44  
45  
46  
47  
48

49 In summary, using a concentration index approach, we identified SES-related inequalities in the  
50 distribution of adverse birth outcomes and related maternal factors, with a major impact in rural  
51  
52  
53  
54  
55  
56  
57  
58  
59  
60

1  
2  
3 areas. Future research is needed on the underlying mechanisms driving the observed different  
4  
5 patterns of socioeconomic inequalities in health distribution across the rural–urban spectrum.  
6  
7  
8  
9

## 10 **ACKNOWLEDGEMENTS**

11  
12 None.

## 14 **COMPETING INTERESTS**

15  
16  
17 None.

## 21 **FUNDING**

22  
23 This study was supported by the Canadian Institutes of Health Research (CIHR) and Natural  
24  
25 Sciences and Engineering Research Council of Canada (NSERC): a CIHR/NSERC Collaborative  
26  
27 Health Research Program (FRN: 127789); CONACyT Mexico; and the Emerging Research  
28  
29 Team Grant, University of Alberta. Data provider: Alberta Perinatal Health Program. This study  
30  
31 is part of the Data Mining and Neonatal Outcomes project (DoMINO-project: Team members in:  
32  
33 <https://sites.google.com/a/ualberta.ca/domino/home/team-members>). Dr. Maria Ospina is funded  
34  
35  
36  
37 by the generous supporters of the Lois Hole Hospital for Women through the Women and  
38  
39 Children’s Health Research Institute. The study sponsors had no role in the design and conduct  
40  
41 of the study; in the collection, management, analysis and interpretation of data; and in the  
42  
43 preparation, review, or approval of the manuscript.  
44  
45  
46  
47  
48  
49  
50  
51  
52  
53  
54  
55  
56  
57  
58  
59  
60

**REFERENCES**

1. Beck S, Wojdyla D, Say L, et al. The worldwide incidence of preterm birth: A systematic review of maternal mortality and morbidity. *Bull World Health Organ* 2010;88:31-38.
2. Black RE. Global prevalence of small for gestational age births. In: Embleton ND, Katz J, Ziegler EE (eds): *Low-Birthweight Baby: Born Too Soon or Too Small. Nestlé Nutr Inst Workshop Ser* 2015;81:1-7 doi:<https://doi.org/10.1159/000365790>
3. Kim SY, Sharma AJ, Sappenfield W, et al. Association of maternal body mass index, excessive weight gain, and gestational diabetes mellitus with large-for-gestational-age births. *Obstet Gynecol* 2014;123:737-744.
4. Blencowe H, Cousens S, Chou D, et al. Born too soon: The global epidemiology of 15 million preterm births. *Reprod Health* 2013;10(Suppl 1):S2.
5. Solar O, Irwin A. A conceptual framework for action on the social determinants of health. *Social Determinants of Health Discussion Paper 2 (Policy and Practice)*. Geneva: WHO, 2010
6. Gluckman PD, Hanson MA, Cooper C, et al. Effect of in utero and early-life conditions on adult health and disease. *N Engl J Med* 2008;359:61–73.
7. Keyes KM, Galea S. *Population health science*. Oxford: Oxford University Press 2016.
8. McCartney GC, Chik Mackenzie M. What (or who) causes health inequalities: Theories, evidence and implications? *Health Policy* 2013;113:221-227.
9. Marmot M, Ruth. Social inequalities in health: A proper concern of epidemiology. *Ann Epidemiol* 2016;26:238-240.

- 1  
2  
3 10. Frohlich KL, Potvin L. Transcending the known in public health practice: The inequality  
4 paradox: The population approach and vulnerable populations. *Am J Public Health*  
5  
6 2008;98:216-221.  
7
- 8  
9  
10 11. Costa-Font JC. Measuring inequalities in health: What do we know? what do we need to  
11 know? *Health Policy* 2012;106:195-206.  
12
- 13  
14 12. Metcalfe A, Lail P, Ghali WA, et al. The association between neighbourhoods and  
15 adverse birth outcomes: a systematic review and meta-analysis of multi-level studies.  
16  
17 *Paediatr Perinat Epidemiol* 2011;25:236–245.  
18
- 19  
20 21 13. Amjad S, MacDonald I, Chambers T, et al. Social determinants of health and adverse  
22 maternal and birth outcomes in adolescent pregnancies: A systematic review and meta-  
23 analysis. *Paediatr Perinat Epidemiol* 2019;33:88-99.  
24  
25  
26  
27
- 28 14. Blumenshine P, Egerter S, Barclay CJ, et al. Socioeconomic disparities in adverse birth  
29 outcomes: A systematic review. *Am J Prev Med* 2010;39:263.  
30  
31  
32
- 33 15. Kim D, Saada A. The social determinants of infant mortality and birth outcomes in  
34 western developed nations: A cross-country systematic review. *Int J Environ Res Public*  
35  
36  
37  
38 *Health* 2013;10:2296-2335.  
39
- 40 16. Abdel-Latif ME, Bajuk B, Oei J, et al. Does rural or urban residence make a difference to  
41 neonatal outcome in premature birth? A regional study in Australia. *Arch Dis Child Fetal*  
42  
43  
44  
45 *Neonatal Ed* 2006;91:F256.  
46
- 47 17. Lisonkova S, Sheps SB, Janssen PA, et al. Birth outcomes among older mothers in rural  
48 versus urban areas: A Residence-Based approach. *J Rural Health* 2011;27:211-219.  
49
- 50 18. Kent ST, McClure LA, Zaitchik BF, et al. Area-level risk factors for adverse birth  
51 outcomes: Trends in urban and rural settings. *BMC Pregnancy Childbirth* 2013;13:129.  
52  
53  
54  
55  
56  
57  
58  
59

19. Wine O, Zaiane O, Osornio Vargas A. A collaborative research exploration of pollutant mixtures and adverse birth outcomes by using innovative spatial data mining methods: The DoMiNO project. *Challenges* 2019;10:25.
20. Statistics Canada. Census Profile, 2016 Census. 2017; Available from: <https://www12.statcan.gc.ca/census-recensement/2016/dp-pd/prof/index.cfm?Lang=E>. Accessed 11/23, 2017.
21. Kramer MS, Platt RW, Wen SW, et al. A new and improved population-based canadian reference for birth weight for gestational age. *Pediatrics* 2001;108(2):e35.
22. Statistics Canada. 2006 Census Dictionary. 2006. Available at: <https://www12.statcan.gc.ca/census-recensement/2006/ref/dict/index-eng.cfm>. Accessed 06/05, 2017.
23. Statistics Canada. Census-Boundary files: Reference Guide. 2007; Available at: <https://www12.statcan.gc.ca/census-recensement/2011/geo/ref/2006/92-160-072305/92-160-0723052006003-eng.htm>. Accessed 06/05, 2017.
24. DMTI Spatial Inc. Platinum postal suite: CanMap multiple enhanced postal code geography 2001-2013. Computer File. 2014.
25. Statistics Canada. Geo Suite. 2006. Available at: <https://geosuite.statcan.gc.ca/geosuite/en/index>. Accessed 02/02, 2017.
26. Chan E, Serrano J, Chen L, et al. Development of a Canadian socioeconomic status index for the study of health outcomes related to environmental pollution. *BMC Public Health* 2015;15:714.
27. Borrell LN, Rodriguez-Alvarez E, Savitz DA, et al. Parental race/ethnicity and adverse birth outcomes in New York City: 2000–2010. *Am J Public Health* 2016;106:1491-1497.

- 1  
2  
3 28. Wagstaff A, Paci P, van Doorslaer E. On the measurement of inequalities in health. *Soc*  
4  
5 *Sci Med*. 1991;33:545-57.  
6  
7  
8 29. Regidor E. Measures of health inequalities: part 2. *J Epidemiol Community Health*  
9  
10 2004;58:900–903. doi: 10.1136/jech.2004.023036  
11  
12 30. Erreygers G, Van Ourti T. Measuring socioeconomic inequality in health, health care and  
13  
14 health financing by means of rank-dependent indices: A recipe for good practice. *J*  
15  
16 *Health Economics* 2011;30:685-694.  
17  
18  
19 31. Neudorf C, Fuller D, Cushon J, et al. An analytic approach for describing and prioritizing  
20  
21 health inequalities at the local level in Canada: A descriptive study. *CMAJ Open*  
22  
23 2015;3:E366-372.  
24  
25  
26 32. Bertin M, Viel J, Monfort C, et al. Socioeconomic disparities in adverse birth outcomes  
27  
28 in urban and rural contexts: A French mother-child cohort. *Paediatr Perinat Epidemiol*  
29  
30 2015;29:426-435.  
31  
32  
33 33. Amjad S, Chandra S, Osornio-Vargas A, et al. Maternal area of residence, socioeconomic  
34  
35 status, and risk of adverse maternal and birth outcomes in adolescent mothers. *J Obstet*  
36  
37 *Gynaecol Can* 2019. In Press. Apr 29. Doi:<https://doi.org/10.1016/j.jogc.2019.02.126>.  
38  
39  
40 34. Luo Z, Wilkins R. Degree of rural isolation and birth outcomes. *Paediatr Perinat*  
41  
42 *Epidemiol* 2008;22:341-349.  
43  
44  
45 35. Grzybowski S, Stoll K, Kornelsen J. Distance matters: A population based study  
46  
47 examining access to maternity services for rural women. *BMC Health Serv Res*  
48  
49 2011;11:147.  
50  
51  
52  
53  
54  
55  
56  
57  
58  
59  
60



- 1  
2  
3 36. Combier E, Charreire H, Le Vaillant M, et al. Perinatal health inequalities and  
4 accessibility of maternity services in a rural french region: Closing maternity units in  
5 burgundy. *Health Place* 2013;24:225-233.  
6  
7  
8  
9  
10 37. Reading R, Raybould S, Jarvis S. Deprivation, low birth weight, and children's height: a  
11 comparison between rural and urban areas. *Br Med J* 1993;307:1458–1462  
12  
13  
14 38. Gorber SC, Schofield-Hurwitz S, Hardt J, et al. The accuracy of self-reported smoking: A  
15 systematic review of the relationship between self-reported and cotinine-assessed  
16 smoking status. *Nicotine Tobacco Res* 2009;11:12-24.  
17  
18  
19  
20  
21 39. Yaya S, Uthman OA, Ekholuenetale M, et al. Socioeconomic inequalities in the risk  
22 factors of noncommunicable diseases among women of reproductive age in Sub-Saharan  
23 Africa: A multi-country analysis of survey data. *Frontiers Public Health* 2018;6:307.  
24  
25  
26  
27  
28 40. Hajizadeh M, Mitnitski A, Rockwood K. Socioeconomic gradient in health in Canada: Is  
29 the gap widening or narrowing? *Health Policy* 2016;120:1040-1050.  
30  
31  
32  
33 41. Galobardes B, Lynch J, Smith GD. Measuring socioeconomic position in health  
34 research. *Br Med Bull* 2007;81-82(1):21-37.  
35  
36  
37  
38  
39  
40 42. Fuller D, Neudorf J, Lockhart S, et al. Individual- and area-level socioeconomic  
41 inequalities in diabetes mellitus in Saskatchewan between 2007 and 2012: A cross-  
42 sectional analysis. *CMAJ Open* 2019;7(1):E33-E39.  
43  
44  
45  
46  
47  
48  
49  
50  
51  
52  
53  
54  
55  
56  
57  
58  
59  
60

## FIGURE LEGENDS

**Figure 1.** Study population flow diagram.

**Figure 2.** Concentration index (CIdx) of adverse birth outcomes and related maternal factors among urban and rural populations in Alberta (2006 – 2012). Horizontal lines indicate 95% confidence interval around the Concentration Index (CIdx). Degrees of inequalities were interpreted based on the absolute value of the concentration index as low ( $\leq |0.05|$ ), medium ( $|0.06$  to  $0.19|$ ), and high ( $\geq |0.20|$ ).

1  
2  
3  
4  
5  
6  
7  
8  
9  
10  
11  
12  
13  
14  
15  
16  
17  
18  
19  
20  
21  
22  
23  
24  
25  
26  
27  
28  
29  
30  
31  
32  
33  
34  
35  
36  
37  
38  
39  
40  
41  
42  
43  
44  
45  
46  
47  
48  
49  
50  
51  
52  
53  
54  
55  
56  
57  
58  
59  
60

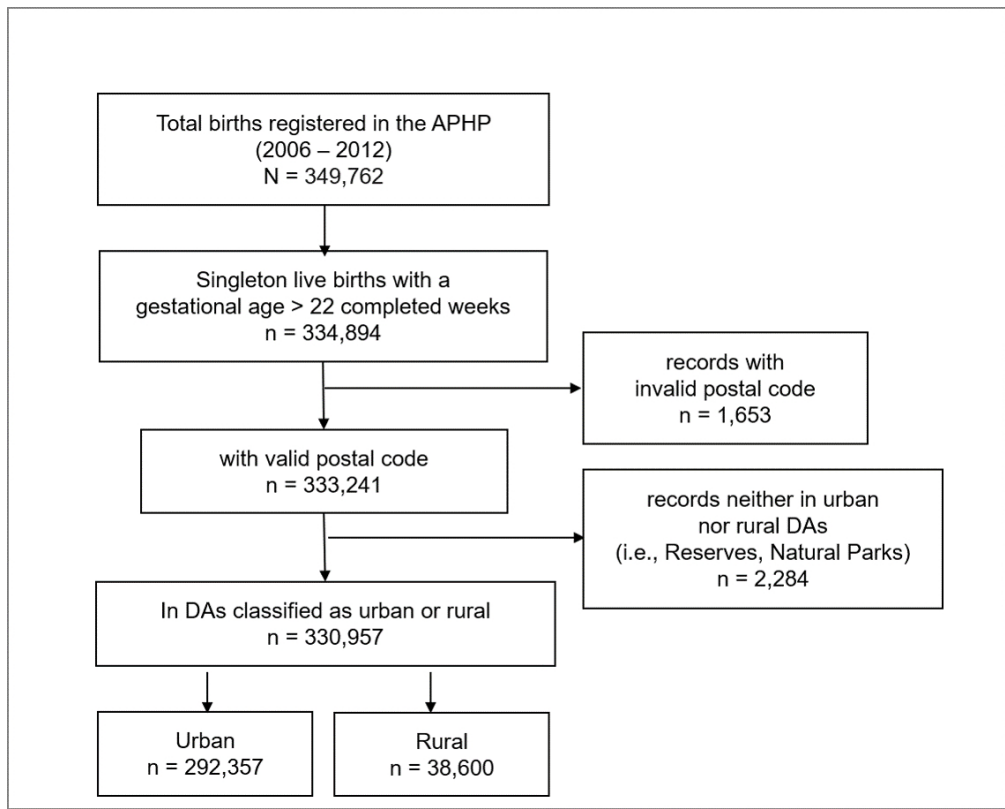

Figure 1. Study population flow diagram.

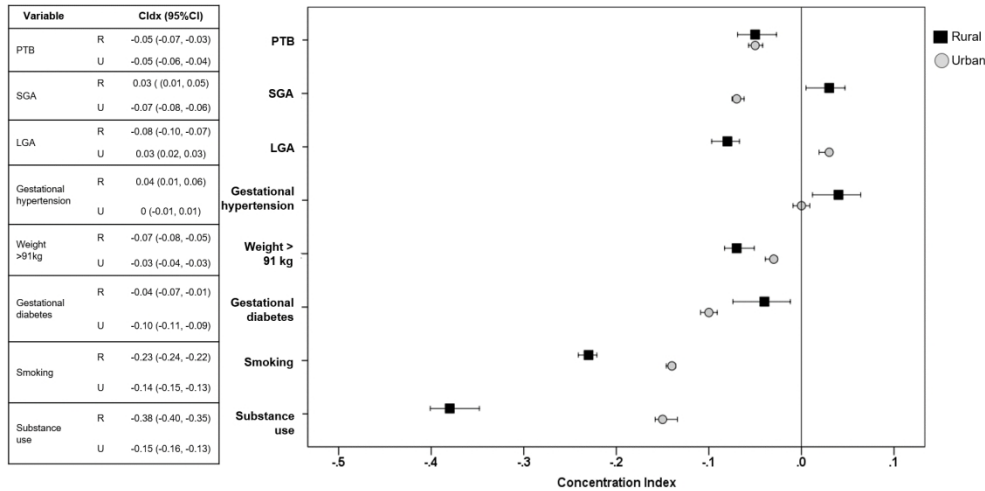

Figure 2. Concentration index (Cidx) of adverse birth outcomes and related maternal factors among urban and rural populations in Alberta (2006 – 2012). Horizontal lines indicate 95% confidence interval around the Concentration Index (Cidx). Degrees of inequalities were interpreted based on the absolute value of the concentration index as low ( $\leq |0.05|$ ), medium ( $|0.06$  to  $0.19|$ ), and high ( $\geq |0.20|$ ).

STROBE Statement—Checklist of items that should be included in reports of *cross-sectional studies*

|                              | Item No | Recommendation                                                                                                                                                                                    | Page No         |
|------------------------------|---------|---------------------------------------------------------------------------------------------------------------------------------------------------------------------------------------------------|-----------------|
| <b>Title and abstract</b>    | 1       | (a) Indicate the study's design with a commonly used term in the title or the abstract                                                                                                            | 3               |
|                              |         | (b) Provide in the abstract an informative and balanced summary of what was done and what was found                                                                                               | 3               |
| <b>Introduction</b>          |         |                                                                                                                                                                                                   |                 |
| Background/rationale         | 2       | Explain the scientific background and rationale for the investigation being reported                                                                                                              | 5-6             |
| Objectives                   | 3       | State specific objectives, including any prespecified hypotheses                                                                                                                                  | 6               |
| <b>Methods</b>               |         |                                                                                                                                                                                                   |                 |
| Study design                 | 4       | Present key elements of study design early in the paper                                                                                                                                           | 7               |
| Setting                      | 5       | Describe the setting, locations, and relevant dates, including periods of recruitment, exposure, follow-up, and data collection                                                                   | 7               |
| Participants                 | 6       | (a) Give the eligibility criteria, and the sources and methods of selection of participants                                                                                                       | 7               |
| Variables                    | 7       | Clearly define all outcomes, exposures, predictors, potential confounders, and effect modifiers. Give diagnostic criteria, if applicable                                                          | 7-9             |
| Data sources/<br>measurement | 8*      | For each variable of interest, give sources of data and details of methods of assessment (measurement). Describe comparability of assessment methods if there is more than one group              | 7-9             |
| Bias                         | 9       | Describe any efforts to address potential sources of bias                                                                                                                                         |                 |
| Study size                   | 10      | Explain how the study size was arrived at                                                                                                                                                         | Population data |
| Quantitative variables       | 11      | Explain how quantitative variables were handled in the analyses. If applicable, describe which groupings were chosen and why                                                                      |                 |
| Statistical methods          | 12      | (a) Describe all statistical methods, including those used to control for confounding                                                                                                             | 9-10            |
|                              |         | (b) Describe any methods used to examine subgroups and interactions                                                                                                                               |                 |
|                              |         | (c) Explain how missing data were addressed                                                                                                                                                       |                 |
|                              |         | (d) If applicable, describe analytical methods taking account of sampling strategy                                                                                                                |                 |
|                              |         | (e) Describe any sensitivity analyses                                                                                                                                                             |                 |
| <b>Results</b>               |         |                                                                                                                                                                                                   |                 |
| Participants                 | 13*     | (a) Report numbers of individuals at each stage of study—eg numbers potentially eligible, examined for eligibility, confirmed eligible, included in the study, completing follow-up, and analysed | 10              |
|                              |         | (b) Give reasons for non-participation at each stage                                                                                                                                              | Figure 1        |
|                              |         | (c) Consider use of a flow diagram                                                                                                                                                                | Figure 1        |
| Descriptive data             | 14      | (a) Give characteristics of study participants (eg demographic, clinical, social) and information on exposures and potential confounders                                                          | 10-11           |
|                              |         | (b) Indicate number of participants with missing data for each variable of interest                                                                                                               | Table 1         |

|                          |     |                                                                                                                                                                                                              |                 |
|--------------------------|-----|--------------------------------------------------------------------------------------------------------------------------------------------------------------------------------------------------------------|-----------------|
| Outcome data             | 15* | Report numbers of outcome events or summary measures                                                                                                                                                         | Table 1         |
| Main results             | 16  | (a) Give unadjusted estimates and, if applicable, confounder-adjusted estimates and their precision (eg, 95% confidence interval). Make clear which confounders were adjusted for and why they were included | Table 1         |
|                          |     | (b) Report category boundaries when continuous variables were categorized                                                                                                                                    |                 |
|                          |     | (c) If relevant, consider translating estimates of relative risk into absolute risk for a meaningful time period                                                                                             |                 |
| Other analyses           | 17  | Report other analyses done—eg analyses of subgroups and interactions, and sensitivity analyses                                                                                                               | 13 and Figure 2 |
| <b>Discussion</b>        |     |                                                                                                                                                                                                              |                 |
| Key results              | 18  | Summarise key results with reference to study objectives                                                                                                                                                     | 13-14           |
| Limitations              | 19  | Discuss limitations of the study, taking into account sources of potential bias or imprecision. Discuss both direction and magnitude of any potential bias                                                   | 15-16           |
| Interpretation           | 20  | Give a cautious overall interpretation of results considering objectives, limitations, multiplicity of analyses, results from similar studies, and other relevant evidence                                   | 14-15           |
| Generalisability         | 21  | Discuss the generalisability (external validity) of the study results                                                                                                                                        | 15              |
| <b>Other information</b> |     |                                                                                                                                                                                                              |                 |
| Funding                  | 22  | Give the source of funding and the role of the funders for the present study and, if applicable, for the original study on which the present article is based                                                | 17              |

# BMJ Open

## Socioeconomic Gradients of Adverse Birth Outcomes and Related Maternal Factors in Rural and Urban Alberta, Canada: A Concentration Index Approach.

|                                 |                                                                                                                                                                                                                                                                                                                                                                                                                                                                                                                                                                                                                                                                                                                                                    |
|---------------------------------|----------------------------------------------------------------------------------------------------------------------------------------------------------------------------------------------------------------------------------------------------------------------------------------------------------------------------------------------------------------------------------------------------------------------------------------------------------------------------------------------------------------------------------------------------------------------------------------------------------------------------------------------------------------------------------------------------------------------------------------------------|
| Journal:                        | <i>BMJ Open</i>                                                                                                                                                                                                                                                                                                                                                                                                                                                                                                                                                                                                                                                                                                                                    |
| Manuscript ID                   | bmjopen-2019-033296.R1                                                                                                                                                                                                                                                                                                                                                                                                                                                                                                                                                                                                                                                                                                                             |
| Article Type:                   | Original research                                                                                                                                                                                                                                                                                                                                                                                                                                                                                                                                                                                                                                                                                                                                  |
| Date Submitted by the Author:   | 06-Dec-2019                                                                                                                                                                                                                                                                                                                                                                                                                                                                                                                                                                                                                                                                                                                                        |
| Complete List of Authors:       | Ospina, Maria; University of Alberta, Department of Obstetrics & Gynecology. Faculty of Medicine & Dentistry<br>Osornio-Vargas, Álvaro Román; University of Alberta, Department of Pediatrics. Faculty of Medicine & Dentistry<br>Nielsen, Charlene; University of Alberta, Department of Pediatrics. Faculty of Medicine & Dentistry<br>Crawford, Susan; Alberta Health Services, Alberta Perinatal Health Program.<br>Kumar, Manoj; University of Alberta, Department of Pediatrics. Faculty of Medicine & Dentistry.<br>Aziz, Khalid; University of Alberta, Department of Pediatrics. Faculty of Medicine & Dentistry<br>Serrano-Lomelin, Jesus; University of Alberta, Department of Obstetrics & Gynecology. Faculty of Medicine & Dentistry |
| <b>Primary Subject Heading</b>: | Public health                                                                                                                                                                                                                                                                                                                                                                                                                                                                                                                                                                                                                                                                                                                                      |
| Secondary Subject Heading:      | Obstetrics and gynaecology, Public health                                                                                                                                                                                                                                                                                                                                                                                                                                                                                                                                                                                                                                                                                                          |
| Keywords:                       | EPIDEMIOLOGY, Maternal medicine < OBSTETRICS, PUBLIC HEALTH, SOCIAL MEDICINE                                                                                                                                                                                                                                                                                                                                                                                                                                                                                                                                                                                                                                                                       |
|                                 |                                                                                                                                                                                                                                                                                                                                                                                                                                                                                                                                                                                                                                                                                                                                                    |

SCHOLARONE™  
Manuscripts



I, the Submitting Author has the right to grant and does grant on behalf of all authors of the Work (as defined in the below author licence), an exclusive licence and/or a non-exclusive licence for contributions from authors who are: i) UK Crown employees; ii) where BMJ has agreed a CC-BY licence shall apply, and/or iii) in accordance with the terms applicable for US Federal Government officers or employees acting as part of their official duties; on a worldwide, perpetual, irrevocable, royalty-free basis to BMJ Publishing Group Ltd ("BMJ") its licensees and where the relevant Journal is co-owned by BMJ to the co-owners of the Journal, to publish the Work in this journal and any other BMJ products and to exploit all rights, as set out in our [licence](#).

The Submitting Author accepts and understands that any supply made under these terms is made by BMJ to the Submitting Author unless you are acting as an employee on behalf of your employer or a postgraduate student of an affiliated institution which is paying any applicable article publishing charge ("APC") for Open Access articles. Where the Submitting Author wishes to make the Work available on an Open Access basis (and intends to pay the relevant APC), the terms of reuse of such Open Access shall be governed by a Creative Commons licence – details of these licences and which [Creative Commons](#) licence will apply to this Work are set out in our licence referred to above.

Other than as permitted in any relevant BMJ Author's Self Archiving Policies, I confirm this Work has not been accepted for publication elsewhere, is not being considered for publication elsewhere and does not duplicate material already published. I confirm all authors consent to publication of this Work and authorise the granting of this licence.



1  
2  
3 **Title.** Socioeconomic Gradients of Adverse Birth Outcomes and Related Maternal Factors in  
4 Rural and Urban Alberta, Canada: A Concentration Index Approach  
5  
6  
7  
8  
9

10 **Authors:** Maria B. Ospina, MSc, PhD;<sup>1</sup> Alvaro Osornio-Vargas, MD, PhD;<sup>2</sup> Charlene C.  
11 Nielsen, PhD;<sup>2</sup> Susan Crawford, MSc;<sup>3</sup> Manoj Kumar, MD, MSc;<sup>2</sup> Khalid Aziz, MD;<sup>2</sup> Jesus A.  
12 Serrano-Lomelin, PhD<sup>1</sup>  
13  
14  
15  
16  
17  
18

19 <sup>1</sup>Department of Obstetrics & Gynecology, Faculty of Medicine & Dentistry; University of  
20 Alberta. Edmonton, Alberta (Canada)  
21  
22  
23  
24  
25

26 <sup>2</sup>Department of Pediatrics, Faculty of Medicine & Dentistry; University of Alberta. Edmonton,  
27 Alberta (Canada)  
28  
29  
30  
31  
32

33 <sup>3</sup>Alberta Perinatal Health Program, Alberta Health Services. Calgary, Alberta (Canada).  
34  
35  
36  
37

### 38 **Corresponding Author**

39 Jesus Serrano-Lomelin, PhD

40 Department of Obstetrics & Gynecology, University of Alberta.

41 220A Heritage Medical Research Centre

42 11313 87 Ave NW, Edmonton, AB, Canada. T6G 2S2

43 Ph: (780) 735-8732; F: (780) 735-4981

44 [45 jaserran@ualberta.ca](mailto:jaserran@ualberta.ca)

46 **Word count: 3,549**  
47  
48  
49  
50  
51  
52  
53  
54  
55  
56  
57  
58  
59  
60

1  
2  
3 **Keywords:** health inequalities; concentration index; adverse birth outcomes; perinatal risk  
4 factors; social medicine.  
5  
6  
7  
8  
9

### 10 **Contributors' Statement**

11  
12 Maria B. Ospina participated in investigation, conceptualization/design, methodology, drafted  
13 the initial manuscript, and approved the final version of the manuscript.  
14  
15

16  
17 Alvaro Osornio-Vargas participated in funding acquisition, resources, conceptualization/design,  
18 supervision, critically review/edit the manuscript, and approved the final version of the  
19 manuscript.  
20  
21

22  
23  
24 Charlene C. Nielsen, participated in conceptualization/design, methodology, geographic analysis,  
25 and approved the final version of the manuscript.  
26  
27

28  
29 Susan Crawford participated in conceptualization/design, resources (health data provider),  
30 critically review/edit the manuscript, and approved the final version of the manuscript.  
31  
32

33  
34  
35 Manoj Kumar participated in funding acquisition, conceptualization/design, supervision,  
36 critically review/edit the manuscript, and approved the final version of the manuscript.  
37  
38

39  
40 Khalid Aziz participated in funding acquisition, conceptualization/design, supervision, critically  
41 review/edit the manuscript, and approved the final version of the manuscript.  
42  
43

44  
45 Jesus Serrano-Lomelin participated in funding acquisition, conceptualization/design, database  
46 management, statistical analysis, critically review/edit the manuscript, and approved the final  
47 version of the manuscript.  
48  
49

## ABSTRACT

**Objective:** Using a summary measure of health inequalities, this study evaluated the distribution of adverse birth outcomes (ABO) and related maternal risk factors across area-level socioeconomic status (SES) gradients in urban and rural Alberta, Canada.

**Design:** Cross-sectional study using a validated perinatal clinical registry and an area-level SES.

**Setting:** The study was conducted in Alberta (Canada). Data about ABO and related maternal risk factors were obtained from the Alberta Perinatal Health Program (APHP) between 2006 to 2012. An area-level SES index derived from census data (2006) was linked to the postal code at delivery.

**Participants:** Women (n=330,957) having singleton live births with gestational age  $\geq 22$  weeks.

**Primary and secondary outcome measures:** We estimated concentration indexes to assess inequalities across SES gradients in both rural and urban areas (CIdx<sub>R</sub> and CIdx<sub>U</sub>, respectively) for spontaneous preterm birth (PTB), small for gestational age (SGA), large for gestational age (LGA), gestational hypertension, gestational diabetes, smoking and/or substance use during pregnancy, and pre-pregnancy weight  $> 91$  kg.

**Results:** The highest health inequalities disfavoring low SES groups were identified for substance abuse and smoking in rural areas (CIdx<sub>R</sub> -0.38 and -0.23, respectively). Medium inequalities were identified for LGA (CIdx<sub>R</sub> -0.08), weight  $>91$ kg (CIdx<sub>R</sub> -0.07), substance use (CIdx<sub>U</sub> -0.15), smoking (CIdx<sub>U</sub> -0.14), gestational diabetes (CIdx<sub>U</sub> -0.10), and SGA (CIdx<sub>U</sub> -0.07). Low inequalities were identified for PTB (CIdx<sub>R</sub> -0.05; CIdx<sub>U</sub> -0.05) and gestational diabetes (CIdx<sub>R</sub> -0.04). Inequalities disfavoring high SES groups were identified for gestational hypertension (CIdx<sub>R</sub> +0.04), SGA (CIdx<sub>R</sub> +0.03), and LGA (CIdx<sub>U</sub> +0.03).

1  
2  
3 **Conclusions:** Adverse birth outcomes and related maternal risk factors were unequally  
4 distributed across the socioeconomic gradient in urban-rural settings, with the greatest  
5 concentrations in lower SES groups of rural areas. Future research is needed on underlying  
6 mechanisms driving SES gradients in perinatal health across the rural/urban spectrum.  
7  
8  
9  
10  
11  
12  
13

#### 14 **Strengths and limitations of this study**

- 15  
16  
17  
18 • This population-based study used a high-quality clinical perinatal registry to quantify  
19 health inequalities for adverse birth outcomes and related risk factors across  
20 socioeconomic groups in rural and urban Alberta (Canada); a province with universal and  
21 free access to medically necessary hospital and physician services for its inhabitants.  
22  
23  
24  
25  
26
- 27 • We used a well-known and robust method, the concentration index, to compare  
28 socioeconomic inequalities in perinatal health in urban and rural areas.  
29  
30  
31
- 32 • The area-level socioeconomic status (SES) index used for this study is based on the 2006  
33 census data. Potential misclassification of the SES may occur as we are assuming no  
34 changes in area-level SES index between 2006 and 2012.  
35  
36  
37
- 38 • Substance abuse and smoking prevalence are expected to be underestimated since they  
39 are self-reported.  
40  
41  
42  
43  
44  
45  
46  
47  
48  
49  
50  
51  
52  
53  
54  
55  
56  
57  
58  
59  
60

## INTRODUCTION

Adverse birth outcomes such as preterm birth (PTB), small for gestational age (SGA), and large for gestational age (LGA) are major drivers of morbidity and mortality in neonates and infants and important contributors to long-term physical and psychological health.[1-3] Many of the determinants of adverse birth outcomes start in pregnancy and even before conception. Maternal factors implicated with the occurrence of adverse outcomes at birth include pre-pregnancy overweight, maternal health problems during pregnancy (e.g., gestational hypertension and diabetes), and certain behaviours such as smoking and substance use.[1, 4] All these perinatal exposures and outcomes constitutes the “canary in the coal mine” as fundamental early-life indicators of the impact of social and structural determinants of health operating in a very sensitive period of human life.[5] Health inequalities at birth would then represent a magnifying glass of preconception disadvantages, and a forecast for adult inequalities.[6]

Socioeconomic inequalities in health are quantitative differences in the occurrence of health outcomes across socioeconomic groups,[7] and a topic of great interest in social epidemiology to better understand the structural causes of health and disease.[8, 9] Recent systematic reviews have examined the influences of socioeconomic characteristics on the risk of adverse birth outcomes, suggesting a strong link between area-level socioeconomic status (SES) gradients and a variety of adverse birth outcomes.[10-13] Knowledge gaps remain to fully understand the interconnections between socioeconomic characteristics, area of residence, and maternal and perinatal health. Exploring this association is particularly important as both urban and rural living have been also associated with adverse health outcomes.[14] However, it is unknown whether health advantages and disadvantages of living in urban and rural areas are equally

1  
2  
3 distributed in all socioeconomic groups or if gradients in health exist affecting the more  
4 disadvantaged groups. On the one hand, diverse theories about urban residence posit that cities  
5 create harmful environments for human health.[15-17] Alternatively, rural areas encompassing  
6 vast extensions of land have been also associated with poor outcomes.[18] Despite the growing  
7 interest in recent years about the role of spatial[19] and socioeconomic-driven inequalities[9] in  
8 the distribution of adverse birth outcomes and associated maternal factors, studies in this area  
9 have mainly evaluated urban populations. Few studies[14, 20] have examined the relationship  
10 between adverse birth outcomes and neighborhood deprivation in rural versus urban  
11 communities, a relevant health policy issue in countries where the access to health services is  
12 universal. The study of socioeconomic health inequalities have been traditionally based on  
13 population-at-risk approaches, which have underpinned the socioeconomic gradient as a risk  
14 factor for poor health.[21, 22] The majority of these studies have used analytical approaches  
15 based on measures of association (i.e., regression and Pearson coefficients), and measures of  
16 potential impact (i.e., proportion attributable proportions[23]) while other methods based on  
17 summary measures of health inequality have been seldom explored.[23]

18  
19  
20  
21  
22  
23  
24  
25  
26  
27  
28  
29  
30  
31  
32  
33  
34  
35  
36  
37  
38  
39  
40 Using the health concentration index approach, this study quantified health inequalities in the  
41 distribution of PTB, SGA, LGA, and related known maternal factors (i.e., pre-pregnancy weight  
42 >91 kg, gestational hypertension, gestational diabetes, self-reported smoking and/or substance  
43 use during pregnancy) in urban and rural Alberta (Canada) across a socioeconomic gradient.  
44  
45  
46  
47  
48  
49 Like all other Canadian provinces, Alberta has a universal, publicly funded health care system  
50 that guarantees Albertans receive free access to medically necessary hospital and physician  
51 services. The concentration index quantifies the magnitude of perinatal health inequalities across  
52  
53  
54  
55  
56  
57  
58  
59  
60

1  
2  
3 different populations while taking into account both the distribution of the study population  
4  
5 across the different socioeconomic groups. We hypothesize that adverse birth outcomes in urban  
6  
7 and rural areas are distributed differently and potentially related to socioeconomic gradients  
8  
9 within the two areas of residence.  
10  
11  
12  
13

## 14 **METHODS**

15  
16  
17 This study is part of a broader environmental health research that explored associations between  
18  
19 environmental and social factors with adverse birth outcomes.[24] The study received ethics  
20  
21 approval from the University of Alberta Research Ethics Board in Edmonton, Alberta (Canada).  
22  
23  
24  
25

### 26 **Study design and population**

27  
28 We conducted a cross-sectional population-based study using provincial health data from Alberta  
29  
30 (Canada) for the period of January 1, 2006, to December 31, 2012. Alberta is a culturally diverse  
31  
32 province located in Western Canada with a population of 4,067,175 inhabitants in 2016 with  
33  
34 approximately 83% living in urban centers.[25]  
35  
36  
37  
38  
39

40 The study population consisted of all women having singleton live births with gestational age  $\geq$   
41  
42 22 completed weeks during the study period. We used data from the Alberta Perinatal Health  
43  
44 Program (APHP), which is a validated clinical perinatal registry that collects data directly from  
45  
46 the provincial delivery record for all births occurring in a hospital or attended by a registered  
47  
48 midwife at home in Alberta. Delivery characteristics and newborn health status recorded in the  
49  
50 APHP include birth weight, gestational age at delivery in completed weeks, maternal postal code  
51  
52 of residence at delivery, lifestyle behaviours before and during pregnancy, maternal health status,  
53  
54 obstetric interventions and neonatal outcomes.  
55  
56  
57  
58  
59  
60

### **Adverse birth outcomes**

Preterm birth (PTB) was defined as newborn with less than 37 completed weeks of gestational age. Newborns were identified as SGA (birth weight below the 10<sup>th</sup> percentile) and LGA (birth weight above the 90<sup>th</sup> percentile) according to Canadian sex-age specific, population-based standards.[26]

### **Maternal factors related with PTB, SGA and LGA**

Information on the following maternal factors was extracted from the APHP: age at delivery, pre-pregnancy weight >91 kg, gestational hypertension, gestational diabetes (documented hyperglycemia with diagnosis during current pregnancy only), self-reported smoking (anytime during pregnancy) and/or substance use during pregnancy (three drinks or more on any occasion during pregnancy or one or more alcohol drinks per day while pregnant, and/or drug dependency, inappropriate or excessive use of any substance).

### **Definitions of urban and rural maternal place of residence at delivery**

We used the 2006 geographic standards provided by Statistics Canada to classify areas of residence (urban, rural) and georeferenced data for postal code locations.[27] The six-character postal codes of the maternal place of residence at delivery were classified as rural or urban according to population concentration and density, based on the 2006 geographic framework. First, postal codes were assigned to their corresponding dissemination area (DA: a census geographic area larger than postal codes with a population of 400 to 700 persons according to the 2006 census geography definition).[28] A vector overlay of postal code locations within the Statistics Canada DA boundary file was performed to capture postal codes not included in the



1  
2  
3 2006 geographic framework.[29] The DA geolocation of postal codes was then used to classify  
4 maternal place of residence at delivery into urban or rural. A DA was considered urban if it had a  
5 minimum population concentration of 1,000 persons and a population density of at least 400  
6 persons per square kilometer based on the 2006 Census population count; otherwise, the DA was  
7 classified as rural.[28]  
8  
9  
10  
11  
12  
13

### 14 15 16 17 **Socioeconomic status gradients**

18  
19 The 2006 socioeconomic status (SES) index developed by Chan et al[30] was chosen to  
20 represent area-based socioeconomic gradients in the study population. This index is based on  
21 area-level information about education attainment, employment status, income, marital status,  
22 home ownership, transport mode, and year of home-construction, among other variables taken  
23 from the 2006 national Census. Additionally, the SES index incorporated a measure of  
24 Indigenous status or the human developmental index of the individuals' country of origin as a  
25 proxy for ethnicity; which is a variable that has been linked to perinatal outcomes.[11, 31] The  
26 SES index was ranked in quintiles (Q1 to Q5) at the DA level, where Q1 and Q5 correspond to  
27 the lowest and highest SES, respectively.  
28  
29  
30  
31  
32  
33  
34  
35  
36  
37  
38  
39  
40  
41

### 42 **Statistical analyses**

43  
44 We calculated the period prevalence of PTB, SGA, LGA, and related maternal factors in both  
45 urban and rural settings across SES quintiles. We calculated the absolute concentration index[23]  
46 with 95% confidence intervals (95%CI) to measure inequalities in the period prevalence of  
47 adverse birth outcomes and related maternal factors by SES groups in both rural ( $CId_{x_R}$ ) and  
48 urban ( $CId_{x_U}$ ) settings. Briefly, the concentration index measures inequality in the distribution of  
49 a health variable (i.e., adverse birth outcomes or related maternal factors) over the population  
50  
51  
52  
53  
54  
55  
56  
57  
58  
59  
60

1  
2  
3 grouped across the SES quintiles.[23, 32] Values of the concentration index range from -1 to +1  
4  
5 where the larger the absolute value of the concentration index, the higher the level of health  
6  
7 inequalities.[22] A value of zero indicates the absence of a socioeconomic gradient in the  
8  
9 distribution of adverse birth outcomes and related factors in the study population. Positive values  
10  
11 indicate a concentration of the health outcome among advantaged groups, while negative values  
12  
13 indicate a concentration of the health outcome among the more disadvantaged ones.[33] Degrees  
14  
15 of inequalities were interpreted based on the absolute value of the concentration index as low ( $\leq$   
16  
17  $|0.05|$ ), medium ( $|0.06$  to  $0.19|$ ), and high ( $\geq |0.20|$ ).[34]  
18  
19  
20  
21  
22

23  
24 We used forest plots to display  $CIdx_R$  and  $CIdx_U$  values with 95% CI for both adverse birth  
25  
26 outcomes and related maternal factors. If the estimate of the concentration index and its 95%CI  
27  
28 cross zero (no inequality), all SES groups have the same distribution of the health outcome and  
29  
30 no socioeconomic gradient exists. If concentration index and 95% CI values are to the left of the  
31  
32 no inequality line, a socioeconomic gradient exist with lower SES groups having a higher  
33  
34 concentration of the outcomes. If values are to the right of the no inequality line, the outcome is  
35  
36 concentrated in higher SES groups. All statistical analyses were performed using Stata version  
37  
38 15.1 (StataCorp., College Station, TX, USA).  
39  
40  
41  
42  
43

#### 44 **Patient or public involvement**

45  
46 No patient involved.  
47  
48  
49  
50

#### 51 **RESULTS**

52  
53 A total of 349,762 births occurred in Alberta between 2006 and 2012, of which 334,894 were  
54  
55 singleton live births with gestational age  $>22$  of completed weeks. A total of 330,957 deliveries  
56  
57  
58  
59

1  
2  
3 were included in the analyses after geographic classification (**Figure 1**), of which 292,357 were  
4  
5 births from women living in urban settings, and 38,600 from those living in rural areas at time of  
6  
7 delivery. Small numbers of missing values were present for maternal weight, gestational  
8  
9 hypertension, gestational diabetes, and smoking during pregnancy in the urban (0.81%; n =  
10  
11 2,667) and rural areas (1.3%; n = 497). There were no missing values for PTB, SGA, and LGA  
12  
13 categories in both urban and rural areas.  
14  
15  
16  
17  
18

### 19 **Prevalence of adverse birth outcomes and related maternal factors in urban and rural** 20 **settings**

21  
22 **Table 1** and **Figures 2** and **3** show the prevalence of adverse birth outcomes and maternal factors  
23  
24 by SES groups in rural and urban areas. The overall PTB prevalence was similar in both rural  
25  
26 and urban settings (6.8%); with small differences across SES quintiles and reductions as the SES  
27  
28 and urban settings (6.8%); with small differences across SES quintiles and reductions as the SES  
29  
30 increased in urban areas. The prevalence of SGA was consistently higher in urban areas (9.2%  
31  
32 [95% CI 9.1, 9.3] versus 6.8% [95% CI 6.5, 7.0]). Urban prevalence of SGA decreased with  
33  
34 higher SES while rural SGA prevalence increased with higher SES. LGA prevalence was higher  
35  
36 in rural areas (12.7% [95% CI 12.3, 13.0]) and decreased as the SES increased (Q1: 16.1% [95%  
37  
38 CI 15.3, 16.9]; Q5: 10.5% [95% CI 9.9, 11.2]); while in urban settings, LGA prevalence  
39  
40 increased from 8.6% (95% CI 8.3, 8.8) to 10.1% (95% CI 9.8, 10.3) across the SES gradient.  
41  
42  
43  
44  
45  
46

47 Gestational hypertension was more prevalent in urban (5.3% [95% CI 5.2, 5.4]) versus rural  
48  
49 settings (4.7% [95% CI 4.5, 4.9]) with similar distributions across the SES groups in both urban  
50  
51 and rural areas of residence. The proportion of women with pre-pregnancy weight >91 kg was  
52  
53 higher in rural (11.2% [95% CI 10.8, 11.5]) versus urban areas (9.0% [95% CI 8.9, 9.1]) and  
54  
55  
56  
57  
58  
59  
60

1  
2  
3 both settings had a clear gradient across the SES groups with highest values in the most deprived  
4 group. The prevalence of gestational diabetes was higher in urban (5.2% [95% CI 5.1, 5.3]) than  
5 in rural settings (3.6% [95% CI 3.4, 3.8]), with larger differences between the lowest and highest  
6 SES groups (Q1 7.2% [95% CI 5.1, 5.3]; Q5: 4.1% [95% CI 4.0, 4.3]). In rural settings,  
7 gestational diabetes prevalence was particularly high in the most disadvantaged group compared  
8 to the other SES groups.  
9  
10  
11  
12  
13  
14  
15  
16  
17  
18

19 Smoking during pregnancy was higher in rural (24.1% [95% CI 23.6, 24.5]) versus urban (15.2%  
20 [95% CI 15.0, 15.3]) areas, particularly in the most deprived rural SES group (Q1 45.7% [95%  
21 44.7, 46.8]). For both urban and rural areas, there was a SES gradient in the prevalence of  
22 smoking in pregnancy with lower SES groups having the higher burden of disease. Substance  
23 use during pregnancy was more prevalent in rural areas (5.5% [95% CI 5.2, 5.7]) and showed  
24 slight variations in the distribution across SES groups. Urban prevalence of substance use during  
25 pregnancy (3.0% [95% CI 2.9, 3.0]) showed a gradient across SES groups, with decreasing  
26 numbers as SES increased.  
27  
28  
29  
30  
31  
32  
33  
34  
35  
36  
37  
38  
39  
40  
41  
42  
43  
44  
45  
46  
47  
48  
49  
50  
51  
52  
53  
54  
55  
56  
57  
58  
59  
60

**Table 1.** Prevalence of ABO and Maternal Risk Factors by Socio-Economic Quintiles in Urban and Rural Alberta (2006-2012).

| Maternal Area of Residence at Delivery |                     | Adverse Birth Outcomes |                   |                   | Maternal Risk Factors |                          |                      |                   |                   |
|----------------------------------------|---------------------|------------------------|-------------------|-------------------|-----------------------|--------------------------|----------------------|-------------------|-------------------|
|                                        |                     | PTB                    | SGA               | LGA               | Weight > 91kg         | Gestational hypertension | Gestational diabetes | Smoking           | Substance use     |
| Urban                                  | N                   | 19,924                 | 26,893            | 27,874            | 25,987                | 15,452                   | 15,147               | 44,004            | 8,634             |
|                                        | Overall (% [95%CI]) | 6.8 [6.7, 6.9]         | 9.2 [9.1, 9.3]    | 9.5 [9.4, 9.6]    | 9.0 [8.9, 9.1]        | 5.3 [5.2, 5.4]           | 5.2 [5.1, 5.3]       | 15.2 [15.0, 15.3] | 3.0 [2.9, 3.0]    |
|                                        | Q1 (low SES)        | 7.9 [7.7, 8.2]         | 11.4 [11.1, 11.7] | 8.6 [8.3, 8.8]    | 9.0 [8.7, 9.3]        | 5.2 [5.0, 5.4]           | 7.2 [7.0, 7.5]       | 20.1 [19.8, 20.5] | 4.3 [4.1, 4.4]    |
|                                        | Q2                  | 7.2 [7.0, 7.4]         | 10 [9.7, 10.2]    | 9.4 [9.1, 9.6]    | 9.9 [9.6, 10.1]       | 5.3 [5.1, 5.5]           | 5.8 [5.6, 6.0]       | 19.1 [18.8, 19.5] | 3.5 [3.3, 3.6]    |
|                                        | Q3                  | 6.9 [6.7, 7.1]         | 9.1 [8.9, 9.3]    | 9.6 [9.3, 9.8]    | 9.5 [9.3, 9.8]        | 5.4 [5.2, 5.5]           | 4.9 [4.7, 5.1]       | 16.6 [16.3, 16.9] | 3.2 [3.1, 3.4]    |
|                                        | Q4                  | 6.5 [6.3, 6.7]         | 8.8 [8.5, 9.0]    | 9.7 [9.5, 9.9]    | 8.8 [8.5, 9.0]        | 5.5 [5.3, 5.7]           | 5.0 [4.8, 5.1]       | 13.4 [13.1, 13.7] | 2.5 [2.4, 2.7]    |
|                                        | Q5 (high SES)       | 6.1 [5.9, 6.3]         | 7.9 [7.7, 8.1]    | 10.1 [9.8, 10.3]  | 8.1 [7.9, 8.2]        | 5.2 [5.1, 5.4]           | 4.1 [4.0, 4.3]       | 10.0 [9.8, 10.2]  | 2.0 [1.9, 2.1]    |
| Rural                                  | N                   | 2,636                  | 2,616             | 4,895             | 4,248                 | 1,790                    | 1,360                | 9,170             | 2,112             |
|                                        | Overall (% [95%CI]) | 6.8 [6.6, 7.1]         | 6.8 [6.5, 7.0]    | 12.7 [12.3, 13.0] | 11.2 [10.8, 11.5]     | 4.7 [4.5, 4.9]           | 3.6 [3.4, 3.8]       | 24.1 [23.6, 24.5] | 5.5 [5.2, 5.7]    |
|                                        | Q1 (low SES)        | 8.4 [7.8, 8.9]         | 6.4 [5.9, 7.0]    | 16.1 [15.3, 16.9] | 13.5 [12.8, 14.2]     | 4.2 [3.8, 4.7]           | 4.5 [4.1, 5.0]       | 45.7 [44.7, 46.8] | 14.3 [13.6, 15.0] |
|                                        | Q2                  | 6.1 [5.6, 6.6]         | 6.1 [5.6, 6.6]    | 13.0 [12.2, 13.7] | 11.4 [10.6, 12.1]     | 4.7 [4.2, 5.2]           | 3.1 [2.7, 3.5]       | 19.1 [18.2, 19.9] | 2.9 [2.5, 3.3]    |
|                                        | Q3                  | 6.8 [6.1, 7.4]         | 7.2 [6.6, 7.9]    | 11.7 [10.8, 12.5] | 10.7 [9.9, 11.5]      | 4.7 [4.2, 5.3]           | 3.2 [2.7, 3.7]       | 20.6 [19.6, 21.7] | 3.8 [3.3, 4.3]    |
|                                        | Q4                  | 6.5 [6.0, 7.0]         | 7.2 [6.6, 7.7]    | 11.7 [11.1, 12.4] | 10.6 [10.0, 11.3]     | 4.5 [4.1, 4.9]           | 3.3 [2.9, 3.7]       | 20.1 [19.2, 20.9] | 3.2 [2.8, 3.6]    |
|                                        | Q5 (high SES)       | 6.3 [5.8, 6.8]         | 7.0 [6.4, 7.6]    | 10.5 [9.9, 11.2]  | 9.4 [8.8, 10.1]       | 5.4 [4.9, 5.9]           | 3.5 [3.1, 3.9]       | 12.7 [12.0, 13.4] | 2.2 [1.9, 2.5]    |

CI = confidence interval; n = number of cases; Q = quintiles; SES = socioeconomic status

### Concentration indices by SES groups in urban and rural settings

**Figure 4** shows rural ( $CI_{dxR}$ ) and urban ( $CI_{dxU}$ ) concentration indexes for adverse birth outcomes and related maternal factors. The majority of adverse birth outcomes and related maternal factors were unequally distributed, and concentrated in the lower SES groups except for SGA (which was concentrated in higher SES groups of rural areas;  $CI_{dxR}$  0.03 [95% CI 0.01, 0.05]), LGA (concentrated in urban higher SES groups;  $CI_{dxU}$  0.03 [95% CI 0.02, 0.03]) and gestational hypertension (concentrated in higher SES groups of rural areas;  $CI_{dxR}$  0.04 [95% CI 0.01, 0.06]). There were no inequalities in the distribution of gestational hypertension by SES groups in urban areas.

The highest degrees of health inequalities across SES groups were found for substance abuse and smoking in rural areas ( $CI_{dxR}$  |0.38| and |0.23|, respectively). Medium inequalities across SES groups were identified for LGA and weight >91kg in rural areas ( $CI_{dxR}$  |0.08| and |0.07|, respectively) and for substance use ( $CI_{dxU}$  |0.15|), smoking ( $CI_{dxU}$  |0.14|), gestational diabetes ( $CI_{dxU}$  |0.10|), and SGA ( $CI_{dxU}$  |0.07|) in urban settings. A low degree of inequalities was identified in the distribution of PTB ( $CI_{dxR}$  |0.05|), SGA ( $CI_{dxR}$  |0.03|), gestational hypertension ( $CI_{dxR}$  |0.04|), and gestational diabetes ( $CI_{dxR}$  |0.04|) across SES in rural settings. LGA ( $CI_{dxU}$  |0.03|), gestational hypertension ( $CI_{dxU}$  |0.01|), and weight >91 kg ( $CI_{dxU}$  |0.03|) also had a low degree of inequalities across SES groups in urban settings.

### DISCUSSION

In this cross-sectional population-based study, we used concentration indexes to examine SES gradients for adverse birth outcomes and related maternal behavioural factors in urban and rural

1  
2  
3 areas of Alberta. The results revealed that adverse birth outcomes and related maternal factors  
4 are unequally distributed across the socioeconomic gradient in the urban-rural divide, with the  
5 majority of them concentrating in lower SES groups. Specifically, the concentration indexes of  
6 PTB and related maternal factors (pre-pregnancy weight > 91 kg, gestational diabetes, smoking  
7 and substance abuse) demonstrated the existence of a gradient of perinatal inequalities in both  
8 urban and rural areas that affected the lowest SES groups. The largest socioeconomic gradient  
9 was observed for smoking and substance use during pregnancy as lower SES groups from rural  
10 areas were affected the most.  
11  
12  
13  
14  
15  
16  
17  
18  
19  
20  
21  
22  
23

24 The pathways for the associations among area-level deprivation, maternal health, and adverse  
25 birth outcomes are complex and likely multifactorial. We found that area-level deprivation and  
26 geographic area of residence differentially associate with fetal growth and duration of gestation.  
27 One potential explanation for these results is that women residing in rural areas are more  
28 vulnerable to neighbourhood deprivation.[35] For example, there is evidence that pregnant  
29 women in the younger groups living in rural areas have the highest odds for adverse pregnancy  
30 outcomes compared to their counterparts living in urban settings.[36] Additionally, lower SES,  
31 more unhealthy maternal behaviours, and more limited access to health care resources and  
32 adequate prenatal care have been described among rural residents compared to those in urban  
33 areas.[18, 37-39] The existence of synergistic deleterious influences of area-level determinants  
34 and individual factors may account for these differences. Other potential explanations may be  
35 linked to low health literacy in rural populations about the effects of lifestyle behaviours in  
36 childbearing age and the impact on birth outcomes, and shortages in resources to stay better  
37 informed than women living in more urbanized areas.[40] Systemic and structural influences  
38  
39  
40  
41  
42  
43  
44  
45  
46  
47  
48  
49  
50  
51  
52  
53  
54  
55  
56  
57  
58  
59  
60

1  
2  
3 such as food security, health services access may also account for the socioeconomic gradient in  
4  
5 the urban-rural divide. Lastly, the “healthy migration” effect[41] can contribute to our study  
6  
7 results. It is possible that healthy women living in rural and remote areas are most likely to  
8  
9 migrate to more urbanized areas, leaving behind their counterparts at a higher risk of  
10  
11 experiencing adverse birth outcomes.  
12  
13

14  
15  
16  
17 To our knowledge, few studies have evaluated SES gradients in adverse birth outcomes and  
18  
19 related maternal factors in Canada. One study[42] evaluated socioeconomic inequality in health  
20  
21 across the provinces in Canada over time (1998-2011) suggesting that those inequalities have  
22  
23 widened over time, especially among women. However, in this study Alberta was merged with  
24  
25 Saskatchewan and Manitoba to form the Prairies. A few studies have evaluated the influence of  
26  
27 area-level SES on adverse birth outcomes in rural and urban areas using other epidemiological  
28  
29 approaches and yielding conflicting results.[35, 43]  
30  
31  
32  
33

### 34 35 **Strengths and limitations of the study**

36  
37 We used a well-known and robust method, the concentration index, to compare socioeconomic  
38  
39 inequalities in perinatal health in urban and rural areas.[22, 32, 33] Compared to other  
40  
41 approaches to the study of health inequalities, the concentration index has some advantages. For  
42  
43 example, results are not biased by the sample size of the SES strata in the study population. The  
44  
45 graphical display of the concentration index allows a visual representation of the dominance  
46  
47 relationships in the distribution of the outcomes across SES strata and between urban and rural  
48  
49 groups.  
50  
51  
52  
53  
54  
55  
56  
57  
58  
59  
60



1  
2  
3  
4  
5 Our study had some limitations that should be considered when interpreting the results. This  
6  
7 study described the prevalence of maternal factors related to adverse birth outcomes in Alberta  
8  
9 for a singleton birth cohort; thus, generalization of the analysis of concentration indexes to other  
10  
11 places or populations is limited. There are other limitations in this study inherent to the cross-  
12  
13 sectional nature of the study and the lack of detailed clinical information available in the APHP  
14  
15 regarding maternal factors. For example, the variable pre-pregnancy maternal weight > 91 kg  
16  
17 was used as a proxy for overweight/obesity since information on the exact weight and height is  
18  
19 not available in the APHP to calculate body mass index. Another limitation of the study is the  
20  
21 reliance on self-reporting of smoking and substance use during pregnancy. Self-reporting is a  
22  
23 common problem in population studies[44] as these factors may introduce non-differential bias  
24  
25 in the evaluation of the exposures.  
26  
27  
28  
29  
30  
31  
32

33 Another potential limitation in the study is that the SES measure incorporates area-level census  
34  
35 information about income in the calculation. In rural areas, where farming and informal  
36  
37 economic sectors are highly prevalent, income may not be precisely estimated and this may  
38  
39 introduce some misclassification of the SES in the calculations. Despite this, area-level SES  
40  
41 indicators have been used in health research as a good proxy for individual-level measures,[45,  
42  
43 46] and our analyses were disaggregated by SES quantiles in urban and rural areas separately.  
44  
45 This approach allowed the identification of subgroups where special attention is needed in both  
46  
47 urban and rural areas. Area-level measures of SES gradients are important to describe  
48  
49 inequalities in health outcomes across populations.[47, 48] There is evidence that these aggregate  
50  
51 measures are good proxies for individual deprivation, have similar performance than individual-  
52  
53  
54  
55  
56  
57  
58  
59  
60

1  
2  
3 level SES measures, and represent a low risk of ecological bias.[49] Furthermore, we did not use  
4 area-level data to impute individual values in the study cohort but rather used individual maternal  
5 postal codes to assign cohort members to a dissemination area that shared particular features  
6 from a census perspective. Since both the exposure (maternal postal code) and outcome were  
7 measured at the individual level, the risk of ecologic fallacy is likely low.[47]  
8  
9  
10  
11  
12  
13

14  
15  
16 We used area-level data from the 2006 Canadian census for the calculation of the socioeconomic  
17 status (SES) index. The method assumed no changes in area-level deprivation between 2006 and  
18 2012 and therefore, potential misclassification of the SES may occur. Other studies using area-  
19 level deprivation measures have attempted to quantify changes in SES categories over time and  
20 have assumed that SES remains relatively stable over time[30, 46], and that census-based  
21 measures of deprivation can be used in larger comparative studies across decades without loss of  
22 continuity over time.[50, 51]  
23  
24  
25  
26  
27  
28  
29  
30  
31  
32

33  
34  
35 There is concern that area-based SES indexes are likely sensitive to urban-rural differences and  
36 that variables that capture deprivation and SES in cities may not perform well in rural areas.  
37 Despite these conceptual constraints, there is evidence from other studies showing that available  
38 deprivation indexes can be used legitimately used in both settings, supporting the hypothesis that  
39 the underlying relationship between areal-level SES and health gradients is the same in rural and  
40 urban areas.[35, 52, 53]  
41  
42  
43  
44  
45  
46  
47  
48  
49  
50

## 51 **Future perspectives**

52  
53  
54  
55  
56  
57  
58  
59  
60

1  
2  
3 Studies about socioeconomic gradients in health provide a way to identify gaps that characterize  
4 the health (or ill health) of socioeconomic groups,[7] helping health authorities to evaluate the  
5 performance of health care systems, policies, and interventions.[54] Our evaluation of  
6 inequalities in perinatal health and influential factors across urban and rural areas have important  
7 implications. First, improving accessibility and adequate and high-quality prenatal care,  
8 especially for the lower SES groups may reduce socioeconomic-related inequalities in maternal  
9 and perinatal health in both rural and urban areas. Particularly, the most disadvantaged groups  
10 are concentrated in rural areas in terms of their perinatal outcomes. Interventions targeting these  
11 rural populations in terms of increasing perinatal health and income can be a cost-effective tool  
12 to tackle these health inequalities.  
13  
14  
15  
16  
17  
18  
19  
20  
21  
22  
23  
24  
25  
26  
27

## 28 **Conclusion**

29  
30 In summary, using a concentration index approach, we identified SES-related inequalities in the  
31 distribution of adverse birth outcomes and related maternal factors, with a major impact in rural  
32 areas. Future research is needed on the underlying mechanisms driving the observed different  
33 patterns of socioeconomic inequalities in health distribution across the rural–urban spectrum.  
34  
35  
36  
37  
38  
39  
40  
41

## 42 **ACKNOWLEDGEMENTS**

43  
44 None.

## 45 **COMPETING INTERESTS**

46  
47 None.

## 48 **FUNDING**

1  
2  
3 This study was supported by the Canadian Institutes of Health Research (CIHR) and Natural  
4 Sciences and Engineering Research Council of Canada (NSERC): a CIHR/NSERC Collaborative  
5 Health Research Program (FRN: 127789); CONACyT Mexico; and the Emerging Research  
6 Team Grant, University of Alberta. Data provider: Alberta Perinatal Health Program. This study  
7 is part of the Data Mining and Neonatal Outcomes project (DoMINO-project: Team members in:  
8 <https://sites.google.com/a/ualberta.ca/domino/home/team-members>). Dr. Maria Ospina is funded  
9 by the generous supporters of the Lois Hole Hospital for Women through the Women and  
10 Children's Health Research Institute. The study sponsors had no role in the design and conduct  
11 of the study; in the collection, management, analysis and interpretation of data; and in the  
12 preparation, review, or approval of the manuscript.  
13  
14  
15  
16  
17  
18  
19  
20  
21  
22  
23  
24  
25  
26  
27

#### 28 **DATA AVAILABILITY STATEMENT**

29  
30 The custodian of the data is the provincial program called Alberta Perinatal Health Program.  
31 After they review our research protocol, we obtained anonymized data exclusively for this work  
32 without authorization to share them or to do secondary analysis. Births and maternal data are  
33 available upon formal request to the Alberta Perinatal Health Program.  
34  
35 The data related to the SES index is available from Policy Wise (<http://www.policywise.com>).  
36  
37  
38  
39  
40  
41  
42  
43  
44  
45  
46  
47  
48  
49  
50  
51  
52  
53  
54  
55  
56  
57  
58  
59  
60

**REFERENCES**

1. Beck S, Wojdyla D, Say L, et al. The worldwide incidence of preterm birth: A systematic review of maternal mortality and morbidity. *Bull World Health Organ* 2010;88:31-38.
2. Black RE. Global prevalence of small for gestational age births. In: Embleton ND, Katz J, Ziegler EE (eds): *Low-Birthweight Baby: Born Too Soon or Too Small. Nestlé Nutr Inst Workshop Ser* 2015;81:1-7 doi:<https://doi.org/10.1159/000365790>
3. Kim SY, Sharma AJ, Sappenfield W, et al. Association of maternal body mass index, excessive weight gain, and gestational diabetes mellitus with large-for-gestational-age births. *Obstet Gynecol* 2014;123:737-744.
4. Blencowe H, Cousens S, Chou D, et al. Born too soon: The global epidemiology of 15 million preterm births. *Reprod Health* 2013;10(Suppl 1):S2.
5. Solar O, Irwin A. A conceptual framework for action on the social determinants of health. *Social Determinants of Health Discussion Paper 2 (Policy and Practice)*. Geneva: WHO, 2010
6. Gluckman PD, Hanson MA, Cooper C, et al. Effect of in utero and early-life conditions on adult health and disease. *N Engl J Med* 2008;359:61-73.
7. Keyes KM, Galea S. *Population health science*. Oxford: Oxford University Press 2016.
8. McCartney GC, Chik Mackenzie M. What (or who) causes health inequalities: Theories, evidence and implications? *Health Policy* 2013;113:221-227.
9. Marmot M, Ruth. Social inequalities in health: A proper concern of epidemiology. *Ann Epidemiol* 2016;26:238-240.

10. Metcalfe A, Lail P, Ghali WA, et al. The association between neighborhoods and adverse birth outcomes: a systematic review and meta-analysis of multi-level studies. *Paediatr Perinat Epidemiol* 2011;25:236-245.
11. Amjad S, MacDonald I, Chambers T, et al. Social determinants of health and adverse maternal and birth outcomes in adolescent pregnancies: A systematic review and meta-analysis. *Paediatr Perinat Epidemiol* 2019;33:88-99.
12. Blumenshine P, Egerter S, Barclay CJ, et al. Socioeconomic disparities in adverse birth outcomes: A systematic review. *Am J Prev Med* 2010;39:263.
13. Kim D, Saada A. The social determinants of infant mortality and birth outcomes in western developed nations: A cross-country systematic review. *Int J Environ Res Public Health* 2013;10:2296-2335.
14. Kent ST, McClure LA, Zaitchik BF, et al. Area-level risk factors for adverse birth outcomes: Trends in urban and rural settings. *BMC Pregnancy Childbirth* 2013;13:129.
15. Freudenberg N, Galea S, Vlahov D. Beyond urban penalty and urban sprawl: back to living conditions as the focus of urban health. *J Community Health* 2005;30:1-11.
16. Vlahov D, Freudenberg N, Proietti F, et al. Urban as a determinant of health. *J Urban Health* 2007;84(3 Suppl):i16-26.
17. Vlahov D, Galea S, Gibble E, Freudenberg N. Perspectives on urban conditions and population health. *Cad Saude Publica* 2005;21:949-957.
18. Luo ZC, Wilkins R. Degree of rural isolation and birth outcomes. *Paediatr Perinat Epidemiol* 2008;22:341-349.

19. Abdel-Latif ME, Bajuk B, Oei J, et al. Does rural or urban residence make a difference to neonatal outcome in premature birth? A regional study in Australia. *Arch Dis Child Fetal Neonatal Ed* 2006;91:F256.
20. Lisonkova S, Sheps SB, Janssen PA, et al. Birth outcomes among older mothers in rural versus urban areas: A residence-based approach. *J Rural Health* 2011;27:211-219.
21. Frohlich KL, Potvin L. Transcending the known in public health practice: The inequality paradox: The population approach and vulnerable populations. *Am J Public Health* 2008;98:216-221.
22. Costa-Font JC. Measuring inequalities in health: What do we know? what do we need to know? *Health Policy* 2012;106:195-206.
23. Wagstaff A, Paci P, van Doorslaer E. On the measurement of inequalities in health. *Soc Sci Med*. 1991;33:545-57.
24. Serrano-Lomelin J, Nielsen CC, Jabbar MSM, et al. Interdisciplinary-driven hypotheses on spatial associations of mixtures of industrial air pollutants with adverse birth outcomes. *Environ Int* 2019;131:104972.
25. Statistics Canada. Census Profile, 2016 Census. 2017; Available from: <https://www12.statcan.gc.ca/census-recensement/2016/dp-pd/prof/index.cfm?Lang=E>. Accessed 11/23, 2017.
26. Kramer MS, Platt RW, Wen SW, et al. A new and improved population-based canadian reference for birth weight for gestational age. *Pediatrics* 2001;108:e35.
27. Statistics Canada. Geo Suite. 2006. Available at: <https://geosuite.statcan.gc.ca/geosuite/en/index>. Accessed 02/02, 2017.

- 1  
2  
3 28. Statistics Canada. 2006 Census Dictionary. 2006. Available  
4  
5 at: <https://www12.statcan.gc.ca/census-recensement/2006/ref/dict/index-eng.cfm>. Accessed  
6  
7 06/05, 2017.  
8  
9
- 10 29. Statistics Canada. Census-Boundary files: Reference Guide. 2007; Available  
11  
12 at: [https://www12.statcan.gc.ca/census-recensement/2011/geo/ref/2006/92-160-072305/92-](https://www12.statcan.gc.ca/census-recensement/2011/geo/ref/2006/92-160-072305/92-160-0723052006003-eng.htm)  
13  
14 [160-0723052006003-eng.htm](https://www12.statcan.gc.ca/census-recensement/2011/geo/ref/2006/92-160-072305/92-160-0723052006003-eng.htm). Accessed 06/05, 2017.  
15  
16
- 17 30. Chan E, Serrano J, Chen L, et al. Development of a Canadian socioeconomic status index  
18  
19 for the study of health outcomes related to environmental pollution. *BMC Public Health*  
20  
21 2015;15:714.  
22  
23
- 24 31. Borrell LN, Rodriguez-Alvarez E, Savitz DA, et al. Parental race/ethnicity and adverse birth  
25  
26 outcomes in New York City: 2000–2010. *Am J Public Health* 2016;106:1491-1497.  
27  
28
- 29 32. Regidor E. Measures of health inequalities: part 2. *J Epidemiol Community Health*  
30  
31 2004;58:900–903. doi: 10.1136/jech.2004.023036.  
32
- 33 33. Erreygers G, Van Ourti T. Measuring socioeconomic inequality in health, health care and  
34  
35 health financing by means of rank-dependent indices: A recipe for good practice. *J Health*  
36  
37 *Economics* 2011;30:685-694.  
38  
39
- 40 34. Neudorf C, Fuller D, Cushon J, et al. An analytic approach for describing and prioritizing  
41  
42 health inequalities at the local level in Canada: A descriptive study. *CMAJ Open*  
43  
44 2015;3:E366-372.  
45  
46
- 47 35. Bertin M, Viel J, Monfort C, et al. Socioeconomic disparities in adverse birth outcomes in  
48  
49 urban and rural contexts: A French mother-child cohort. *Paediatr Perinat Epidemiol*  
50  
51 2015;29:426-435.  
52  
53  
54  
55  
56  
57  
58  
59  
60



- 1  
2  
3 36. Amjad S, Chandra S, Osornio-Vargas A, et al. Maternal area of residence, socioeconomic  
4 status, and risk of adverse maternal and birth outcomes in adolescent mothers. *J Obstet*  
5  
6 *Gynaecol Can* 2019; 41:1752-1759.  
7  
8
- 9  
10 37. Lisonkova S, Haslam MD, Dahlgren L, Chen I, Synnes AR, Lim KI. Maternal morbidity and  
11 perinatal outcomes among women in rural versus urban areas. *CMAJ* 2016;188:E456-E465.  
12  
13
- 14 38. Grzybowski S, Stoll K, Kornelsen J. Distance matters: A population based study examining  
15 access to maternity services for rural women. *BMC Health Serv Res* 2011;11:147.  
16  
17
- 18 39. Combier E, Charreire H, Le Vaillant M, et al. Perinatal health inequalities and accessibility  
19 of maternity services in a rural french region: Closing maternity units in burgundy. *Health*  
20 *Place* 2013;24:225-233.  
21  
22
- 23 40. Mantwill S, Monestel-Umana S, Schulz PJ. The relationship between health literacy and  
24 health disparities: a systematic rReview. *PLoS One* 2015;10(12):e0145455.  
25  
26
- 27 41. Lu Y, Qin L. Healthy migrant and salmon bias hypotheses: a study of health and internal  
28 migration in China. *Soc Sci Med* 2014;102:41-48.  
29  
30
- 31 42. Hajizadeh M, Mitnitski A, Rockwood K. Socioeconomic gradient in health in Canada: Is the  
32 gap widening or narrowing? *Health Policy* 2016;120:1040-1050.  
33  
34
- 35 43. Reading R, Raybould S, Jarvis S. Deprivation, low birth weight, and children' s height: a  
36 comparison between rural and urban areas. *BMJ* 1993;307:1458–1462  
37  
38
- 39 44. Gorber SC, Schofield-Hurwitz S, Hardt J, et al. The accuracy of self-reported smoking: A  
40 systematic review of the relationship between self-reported and cotinine-assessed smoking  
41 status. *Nicotine Tobacco Res* 2009;11:12-24.  
42  
43
- 44 45. Galobardes B, Lynch J, Smith GD. Measuring socioeconomic position in health research. *Br*  
45 *Med Bull* 2007;81-82(1):21-37.  
46  
47  
48  
49  
50  
51  
52  
53  
54  
55  
56  
57  
58  
59  
60

- 1  
2  
3 46. Fuller D, Neudorf J, Lockhart S, et al. Individual- and area-level socioeconomic inequalities  
4 in diabetes mellitus in Saskatchewan between 2007 and 2012: A cross-sectional analysis.  
5  
6  
7  
8 *CMAJ Open* 2019;7(1):E33-E39.  
9
- 10 47. Subramanian SV, Chen JT, Rehkopf DH, et al. Comparing individual- and area-based  
11 socioeconomic measures for the surveillance of health disparities: A multilevel analysis of  
12 Massachusetts births, 1989-1991. *Am J Epidemiol* 2006;164:823-834.  
13  
14  
15  
16
- 17 48. Krieger N, Chen JT, Waterman PD, et al. Choosing area based socioeconomic measures to  
18 monitor social inequalities in low birth weight and childhood lead poisoning: The Public  
19 Health Disparities Geocoding Project (US). *J Epidemiol Community Health* 2003;57:186-  
20  
21  
22  
23  
24  
25 199.
- 26 49. Bryere J, Pornet C, Copin N, et al. Assessment of the ecological bias of seven aggregate  
27 social deprivation indices. *BMC Public Health* 2017;17(1):86-016-4007-8.  
28  
29
- 30 50. Allik M, Brown D, Dundas R, et al. Developing a new small-area measure of deprivation  
31 using 2001 and 2011 census data from Scotland. *Health Place* 2016;39:122-130.  
32  
33  
34
- 35 51. Mari-Dell'Olmo M, Gotsens M, Palencia L, et al. Socioeconomic inequalities in cause-  
36 specific mortality in 15 European cities. *J Epidemiol Community Health* 2015;69(5):432-  
37  
38  
39  
40  
41 441.
- 42 52. Pampalon R, Hamel D, Gamache P. Health inequalities in urban and rural Canada:  
43 comparing inequalities in survival according to an individual and area-based deprivation  
44  
45  
46  
47  
48 index. *Health Place* 2010;16:416-20.
- 49 53. Bertin M, Chevrier C, Pele F, et al. Can a deprivation index be used legitimately over both  
50  
51  
52  
53  
54  
55  
56  
57  
58  
59  
60

- 1  
2  
3 54. Yaya S, Uthman OA, Ekholuenetale M, et al. Socioeconomic inequalities in the risk factors  
4 of noncommunicable diseases among women of reproductive age in Sub-Saharan Africa: A  
5 multi-country analysis of survey data. *Frontiers Public Health* 2018;6:307.  
6  
7  
8  
9  
10  
11  
12  
13  
14  
15  
16  
17  
18  
19  
20  
21  
22  
23  
24  
25  
26  
27  
28  
29  
30  
31  
32  
33  
34  
35  
36  
37  
38  
39  
40  
41  
42  
43  
44  
45  
46  
47  
48  
49  
50  
51  
52  
53  
54  
55  
56  
57  
58  
59  
60

## FIGURE LEGENDS

**Figure 1.** Study population flow diagram.

**Figure 2.** Period prevalence (with 95% confidence interval) of preterm birth (PTB), small for gestational age (SGA), large for gestational age (LGA), and gestational hypertension (GH) across SES quintiles in urban and rural settings.

Footnote: The linear gradient for the prevalence by health outcome across the SES quintiles was tested using regression analysis. The p-value for the linear gradient was incorporated into the graph when it was statistically significant ( $p < 0.05$ ). Note that the y-axis scaling (%) differ among the different panels.

**Figure 3.** Period prevalence (with 95% confidence interval) of maternal weight  $> 91$ kg, gestational diabetes (GD), smoking, and substance use during pregnancy across SES quintiles in urban and rural settings.

Footnote: The linear gradient for the prevalence by health outcome across the SES quintiles was tested using regression analysis. The p-value for the linear gradient was incorporated into the graph when it was statistically significant ( $p < 0.05$ ). Note that the y-axis scaling (%) differ among the different panels.

**Figure 4.** Concentration index (CIdx) of adverse birth outcomes and related maternal factors among urban and rural populations in Alberta (2006 – 2012). Horizontal lines indicate 95%

1  
2  
3 confidence interval around the Concentration Index (CIdx). Degrees of inequalities were  
4  
5 interpreted based on the absolute value of the concentration index as low ( $\leq |0.05|$ ), medium  
6  
7 ( $|0.06$  to  $0.19|$ ), and high ( $\geq |0.20|$ ).  
8  
9  
10  
11  
12  
13  
14  
15  
16  
17  
18  
19  
20  
21  
22  
23  
24  
25  
26  
27  
28  
29  
30  
31  
32  
33  
34  
35  
36  
37  
38  
39  
40  
41  
42  
43  
44  
45  
46  
47  
48  
49  
50  
51  
52  
53  
54  
55  
56  
57  
58  
59  
60

1  
2  
3  
4  
5  
6  
7  
8  
9  
10  
11  
12  
13  
14  
15  
16  
17  
18  
19  
20  
21  
22  
23  
24  
25  
26  
27  
28  
29  
30  
31  
32  
33  
34  
35  
36  
37  
38  
39  
40  
41  
42  
43  
44  
45  
46  
47  
48  
49  
50  
51  
52  
53  
54  
55  
56  
57  
58  
59  
60



Figure 1. Study population flow diagram.

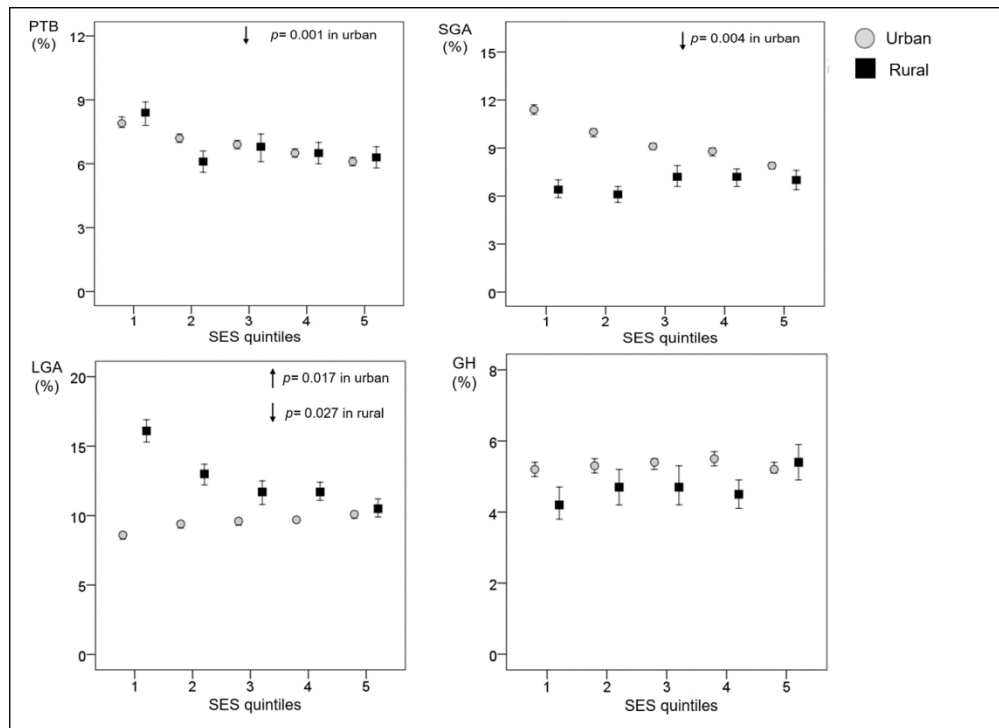

Figure 2. Period prevalence (with 95% confidence interval) of preterm birth (PTB), small for gestational age (SGA), large for gestational age (LGA), and gestational hypertension (GH) across SES quintiles in urban and rural settings.

Footnote: The linear gradient for the prevalence by health outcome across the SES quintiles was tested using regression analysis. The p-value for the linear gradient was incorporated into the graph when it was statistically significant ( $p < 0.05$ ). Note that the y-axis scaling (%) differ among the different panels.

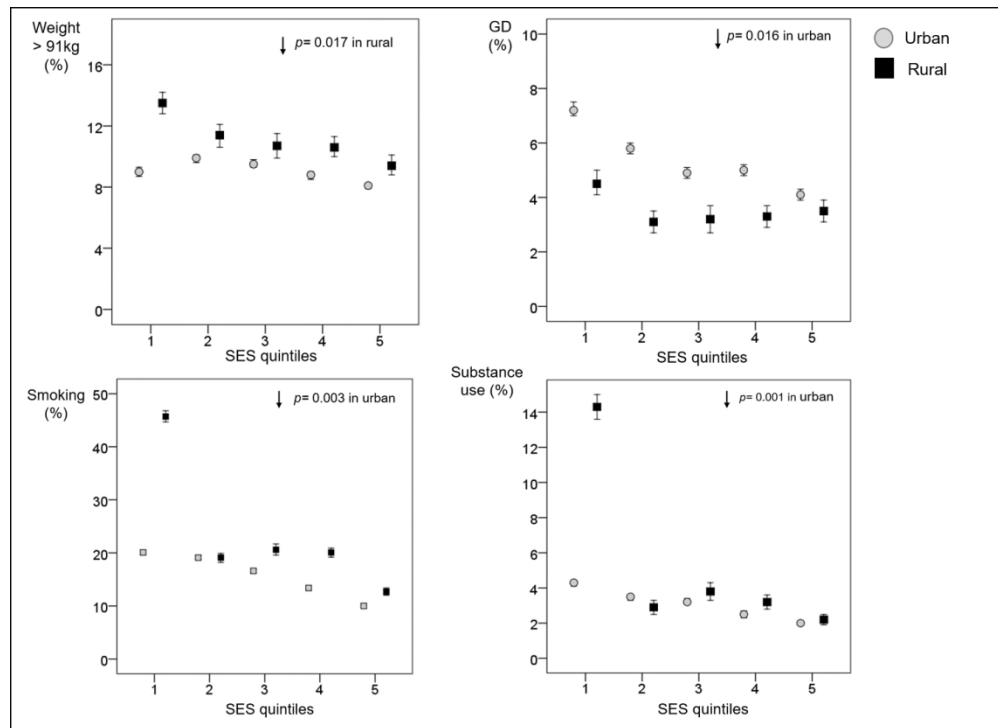

Figure 3. Period prevalence (with 95% confidence interval) of maternal weight > 91kg, gestational diabetes (GD), smoking, and substance use during pregnancy across SES quintiles in urban and rural settings.

Footnote: The linear gradient for the prevalence by health outcome across the SES quintiles was tested using regression analysis. The p-value for the linear gradient was incorporated into the graph when it was statistically significant ( $p < 0.05$ ). Note that the y-axis scaling (%) differ among the different panels.



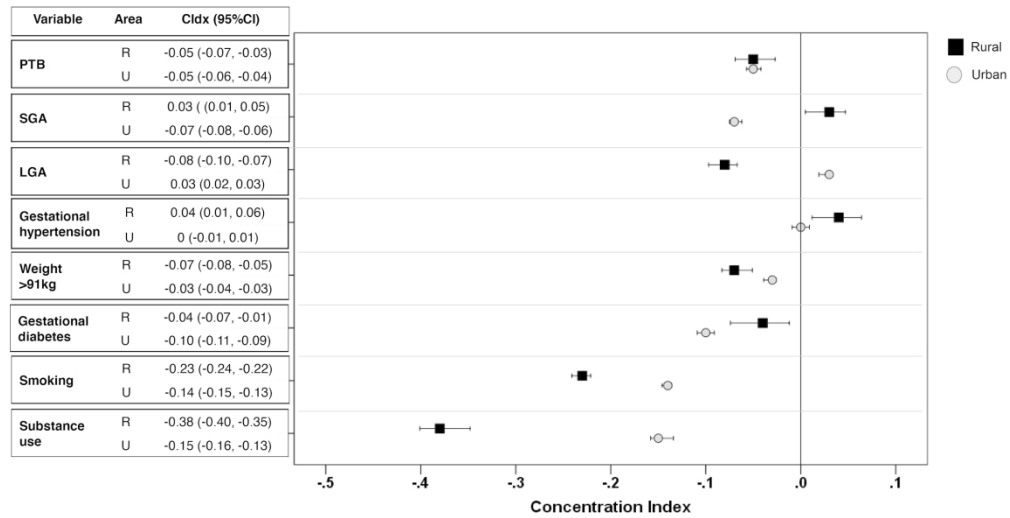

Figure 4. Concentration index (Cidx) of adverse birth outcomes and related maternal factors among urban and rural populations in Alberta (2006 – 2012). Horizontal lines indicate 95% confidence interval around the Concentration Index (Cidx). Degrees of inequalities were interpreted based on the absolute value of the concentration index as low ( $\leq |0.05|$ ), medium ( $|0.06$  to  $0.19|$ ), and high ( $\geq |0.20|$ ).

198x103mm (300 x 300 DPI)

STROBE Statement—Checklist of items that should be included in reports of *cross-sectional studies*

|                              | Item No | Recommendation                                                                                                                                                                                    | Page No                                      |
|------------------------------|---------|---------------------------------------------------------------------------------------------------------------------------------------------------------------------------------------------------|----------------------------------------------|
| <b>Title and abstract</b>    | 1       | (a) Indicate the study's design with a commonly used term in the title or the abstract                                                                                                            | 3                                            |
|                              |         | (b) Provide in the abstract an informative and balanced summary of what was done and what was found                                                                                               | 3                                            |
| <b>Introduction</b>          |         |                                                                                                                                                                                                   |                                              |
| Background/rationale         | 2       | Explain the scientific background and rationale for the investigation being reported                                                                                                              | 5-6                                          |
| Objectives                   | 3       | State specific objectives, including any prespecified hypotheses                                                                                                                                  | 6-7                                          |
| <b>Methods</b>               |         |                                                                                                                                                                                                   |                                              |
| Study design                 | 4       | Present key elements of study design early in the paper                                                                                                                                           | 7                                            |
| Setting                      | 5       | Describe the setting, locations, and relevant dates, including periods of recruitment, exposure, follow-up, and data collection                                                                   | 7                                            |
| Participants                 | 6       | (a) Give the eligibility criteria, and the sources and methods of selection of participants                                                                                                       | 7, 10<br>Patient<br>Involvement<br>Statement |
| Variables                    | 7       | Clearly define all outcomes, exposures, predictors, potential confounders, and effect modifiers. Give diagnostic criteria, if applicable                                                          | 8-9                                          |
| Data sources/<br>measurement | 8*      | For each variable of interest, give sources of data and details of methods of assessment (measurement). Describe comparability of assessment methods if there is more than one group              | 7-9                                          |
| Bias                         | 9       | Describe any efforts to address potential sources of bias                                                                                                                                         |                                              |
| Study size                   | 10      | Explain how the study size was arrived at                                                                                                                                                         | Population data                              |
| Quantitative variables       | 11      | Explain how quantitative variables were handled in the analyses. If applicable, describe which groupings were chosen and why                                                                      |                                              |
| Statistical methods          | 12      | (a) Describe all statistical methods, including those used to control for confounding                                                                                                             | 9-10                                         |
|                              |         | (b) Describe any methods used to examine subgroups and interactions                                                                                                                               |                                              |
|                              |         | (c) Explain how missing data were addressed                                                                                                                                                       |                                              |
|                              |         | (d) If applicable, describe analytical methods taking account of sampling strategy                                                                                                                |                                              |
|                              |         | (e) Describe any sensitivity analyses                                                                                                                                                             |                                              |
| <b>Results</b>               |         |                                                                                                                                                                                                   |                                              |
| Participants                 | 13*     | (a) Report numbers of individuals at each stage of study—eg numbers potentially eligible, examined for eligibility, confirmed eligible, included in the study, completing follow-up, and analysed | 10                                           |
|                              |         | (b) Give reasons for non-participation at each stage                                                                                                                                              | Figure 1                                     |
|                              |         | (c) Consider use of a flow diagram                                                                                                                                                                | Figure 1                                     |

|                          |     |                                                                                                                                                                                                              |                             |
|--------------------------|-----|--------------------------------------------------------------------------------------------------------------------------------------------------------------------------------------------------------------|-----------------------------|
| Descriptive data         | 14  | (a) Give characteristics of study participants (eg demographic, clinical, social) and information on exposures and potential confounders                                                                     | 10-11                       |
|                          |     | (b) Indicate number of participants with missing data for each variable of interest                                                                                                                          | Table 1                     |
| Outcome data             | 15* | Report numbers of outcome events or summary measures                                                                                                                                                         | Table 1                     |
| Main results             | 16  | (a) Give unadjusted estimates and, if applicable, confounder-adjusted estimates and their precision (eg, 95% confidence interval). Make clear which confounders were adjusted for and why they were included | Table 1.<br>Figures 2 and 3 |
|                          |     | (b) Report category boundaries when continuous variables were categorized                                                                                                                                    |                             |
|                          |     | (c) If relevant, consider translating estimates of relative risk into absolute risk for a meaningful time period                                                                                             |                             |
| Other analyses           | 17  | Report other analyses done—eg analyses of subgroups and interactions, and sensitivity analyses                                                                                                               | 14 and<br>Figure 4          |
| <b>Discussion</b>        |     |                                                                                                                                                                                                              |                             |
| Key results              | 18  | Summarise key results with reference to study objectives                                                                                                                                                     | 14-15                       |
| Limitations              | 19  | Discuss limitations of the study, taking into account sources of potential bias or imprecision. Discuss both direction and magnitude of any potential bias                                                   | 16-17                       |
| Interpretation           | 20  | Give a cautious overall interpretation of results considering objectives, limitations, multiplicity of analyses, results from similar studies, and other relevant evidence                                   | 14-18                       |
| Generalisability         | 21  | Discuss the generalisability (external validity) of the study results                                                                                                                                        | 17                          |
| <b>Other information</b> |     |                                                                                                                                                                                                              |                             |
| Funding                  | 22  | Give the source of funding and the role of the funders for the present study and, if applicable, for the original study on which the present article is based                                                | 19-20                       |
